1 **Title:**

2 Major histocompatibility complex class I-restricted protection against murine cytomegalovirus requires  
3 missing-self recognition by the natural killer cell inhibitory Ly49 receptors

4

5 **Authors:**

6 Bijal A. Parikh\*<sup>1</sup>, Michael D. Bern<sup>2</sup>, Sytse J. Piersma<sup>2</sup>, Liping Yang<sup>2</sup>, Diana L. Beckman<sup>2</sup>, Jennifer Poursine-  
7 Laurent<sup>2</sup>, Beatrice Plougastel Douglas<sup>2</sup>, and Wayne M. Yokoyama\*<sup>1,2</sup>

8

9 <sup>1</sup> Department of Pathology and Immunology, Washington University School of Medicine, St. Louis, MO  
10 63110, USA

11 <sup>2</sup> Division of Rheumatology, Department of Medicine, Washington University School of Medicine, St.  
12 Louis, MO 63110, USA

13

14

15 \*Correspondence: Wayne M. Yokoyama: [yokoyama@wustl.edu](mailto:yokoyama@wustl.edu); Bijal A. Parikh: [bparikh@wustl.edu](mailto:bparikh@wustl.edu)

16 **Abstract**

17 Viruses have evolved strategies that highlight critical, intertwined host immune mechanisms. As  
18 postulated by the missing-self hypothesis, natural killer (NK) cells and major histocompatibility complex  
19 class I (MHC-I)-restricted cytotoxic T lymphocytes (CTLs) have opposing requirements for ubiquitously  
20 expressed MHC-I molecules. Since NK cell MHC-I-specific Ly49 inhibitory receptors prevent killing of cells  
21 with normal MHC-I, viruses evading CTLs by down-regulating MHC-I should be vulnerable to NK cells.  
22 However, definitive integrated *in vivo* evidence for this interplay has been lacking, in part due to  
23 receptor polymorphism and a proposed second function of Ly49 receptors in licensing NK cells via self-  
24 MHC-I. Here we generated mice lacking specific Ly49 inhibitory receptors to show their essential role in  
25 licensing and controlling murine cytomegalovirus (MCMV) infection *in vivo* in an MHC-restricted  
26 manner. When MCMV cannot down-regulate MHC-I, NK cells cannot control infection that instead is  
27 mediated by CTLs, as predicted by the missing-self hypothesis.

28 **Introduction**

29 Viruses and their hosts are engaged in an evolutionary “arms race,” highlighting host immune  
30 mechanisms. A critical mechanism involves recognition of virus-infected cells by cytotoxic lymphocytes  
31 that trigger exocytic release of perforin and granzymes to kill infected cells. While virus-specific CD8<sup>+</sup>  
32 cytotoxic T lymphocytes (CTLs) recognize viral peptides presented by MHC class I molecules (MHC-I) on  
33 infected cells, viruses can specifically down-regulate MHC-I, nearly ubiquitously expressed as self, to  
34 evade CTL effector responses [1,2]. The missing-self hypothesis predicts that NK cells should kill cells  
35 that downregulate MHC-I [3], as supported by MHC-I-specific inhibitory NK cell receptors that prevent  
36 NK cell killing of cells with normal MHC-I expression *in vitro* [4,5]. However, the role of inhibitory NK cell  
37 receptors during *in vivo* responses is still poorly understood.

38  
39 In mice, the Ly49 NK cell receptor family is encoded in a gene cluster in the NK gene complex (NKC) on  
40 mouse chromosome 6 [6]. While Ly49s display profound allelic polymorphisms with several haplotypes  
41 and allelic forms, [7] most Ly49s mediate inhibitory function in effector responses through their  
42 cytoplasmic immunoreceptor tyrosine-based inhibitory motifs (ITIMs) [8]. Inhibitory Ly49 receptors bind  
43 MHC-I alleles but their specificities are incompletely understood regarding *in vivo* function and are  
44 reportedly identical, *e.g.*, Ly49A<sup>B6</sup>, Ly49C<sup>B6</sup>, Ly49G<sup>B6</sup>, and Ly49I<sup>B6</sup> recognize H2D<sup>d</sup> [9,10]. Ly49s are  
45 stochastically expressed on overlapping subsets of NK cells with individual NK cells simultaneously  
46 expressing two or more Ly49s. Only receptors specific for self-MHC-I *in vivo* appear to provide a second  
47 function in conferring the licensed phenotype whereby licensed NK cells exhibit enhanced  
48 responsiveness to stimulation through activation receptors *in vitro* [11]. However, due to the potential  
49 role of other receptors [12,13], definitive evidence that MHC-I-dependent licensing plays a role in NK  
50 cell function *in vivo* has not been established.

51

52 In contrast to inhibitory Ly49s, Ly49 activation receptors lack ITIMs and are coupled to immunoreceptor  
53 tyrosine-based activation motif (ITAM)-containing chains, *e.g.* DAP12 [8]. The Ly49H<sup>B6</sup> activation  
54 receptor is responsible for genetic resistance of C57BL/6 (B6) mice to murine cytomegalovirus (MCMV)  
55 infection, providing vital early viral control, even in mice with intact adaptive immunity [14]. Ly49H<sup>B6</sup>  
56 recognizes an MCMV-encoded MHC-I-like molecule, m157 [15]. The Ly49P1<sup>NOD/Ltj</sup>, Ly49L<sup>BALB</sup>, and  
57 Ly49D2<sup>PWK/Pas</sup> activation receptors serve similar functions, albeit with ligands distinct from m157 [16].  
58 Additionally, the inhibitory Ly49I<sup>129</sup> receptor also binds m157 [15,17], suggesting that inhibitory Ly49  
59 receptors play critical roles in viral control, although effects on licensed NK cells also require  
60 consideration.

61  
62 Indeed, prior studies suggested that licensed NK cells hamper MCMV control through inhibitory  
63 receptors for host MHC-I [18]. However, other studies suggest that inhibitory Ly49s may enhance MCMV  
64 control, but these approaches have utilized mouse strains with poorly characterized Ly49s and Ly49  
65 depleting antibodies with unclear specificities and that also affect total NK cell number, confounding  
66 interpretations [16,19,20]. Thus, the *in vivo* role of licensed NK cells and inhibitory Ly49s in viral  
67 infections is incompletely understood.

68  
69 Herein, we used CRISPR-Cas9 to simultaneously and cleanly target multiple Ly49 receptors, allowing  
70 definitive evaluation of the role of Ly49s in missing-self rejection and resistance to MCMV infection. In  
71 turn, we studied how MCMV modulates these host responses.

72 **Results**

73 **MHC-restricted, NK cell-dependent protection against MCMV in mice**

74 To investigate the role of NK cells in MCMV control in different MHC backgrounds, we utilized C57BL/10  
75 (B10, H2<sup>b</sup>) and B10.D2 (H2<sup>d</sup>) MHC-congenic mouse strains that are closely related to B6 (H2<sup>b</sup>) and share  
76 Ly49 haplotypes [21]. Susceptibility at day 4 post-infection (d4 p.i.) to wild-type (WT)-MCMV in B10 mice  
77 was NK cell-dependent, and antibody blocking studies showed protection against WT-MCMV was  
78 dependent upon Ly49H (**Fig 1A**) as shown for B6 mice [14]. To examine other mechanisms of viral  
79 resistance applicable to MCMV isolates from the wild lacking m157 [17], we used  $\Delta$ m157-MCMV that  
80 contains a single nucleotide deletion in m157 that prevents full-length expression. Although B10 mice  
81 were unable to control  $\Delta$ m157-MCMV infection at d4 p.i., MHC-congenic B10.D2 (H2<sup>d</sup>) mice were  
82 resistant (**Fig 1B**), demonstrating an MHC-restricted effect.

83

84 To isolate the MHC-restricted effect to a single MHC-I allele, we showed  $\Delta$ m157-MCMV resistance in B6  
85 mice transgenically expressing only H2D<sup>d</sup>, in the genetic absence of H2K<sup>b</sup> and H2D<sup>b</sup> (D8-KODO),  
86 comparable to B10.D2 mice (**Fig 1C**), indicating resistance was specifically due to H2D<sup>d</sup>. Resistance was  
87 clearly dependent upon NK cells but not CD8<sup>+</sup> T cells, as shown by antibody depletion of NK or CD8<sup>+</sup> T  
88 cells, respectively (**Fig 1B, C**). Thus, MHC-restricted resistance to  $\Delta$ m157-MCMV is due to H2D<sup>d</sup> and is NK  
89 cell-dependent.

90

91 Perforin-deficient (*Prf1*<sup>-/-</sup>) D8-KODO mice were as susceptible as wild type (WT) B6 mice whereas both  
92 perforin WT (*Prf1*<sup>+/+</sup>) and perforin heterozygous (*Prf1*<sup>+/-</sup>) D8-KODO mice controlled  $\Delta$ m157-MCMV (**Fig**  
93 **1D**). Likewise, granzyme-deficient D8-KODO mice could not control  $\Delta$ m157-MCMV (**Fig 1E**). Although  
94 NKG2D enhances NK cell responses to MCMV in B6 mice [22,23], we found no change in viral control by  
95 NKG2D-deficient D8-KODO mice as compared to D8-KODO mice (**Fig 1F**). Thus, NK cell-dependent

96 control of  $\Delta$ m157-MCMV requires cytotoxicity, implying direct target contact, but NKG2D was not  
97 required.

98

### 99 **NK cell resistance requires Ly49 receptor expression**

100 Since Ly49s recognize MHC-I, we assessed their candidacy for being responsible for the MHC-I-  
101 restricted, NK-dependent resistance to  $\Delta$ m157-MCMV by using CRISPR-Cas9 to target their deletion  
102 directly in B6 zygotes. When we used a guide RNA (gRNA) intentionally chosen for its promiscuity for  
103 several *Ly49s*, we generated  $\Delta$ Ly49-1 mice with two distinct deletions: 1) 149kb deletion between *Ly49a*  
104 and *Ly49g* with an out-of-frame fusion; and 2) 66Kb deletion between two pseudogenes, *Ly49n* (*Klra14-*  
105 *ps*) and *Ly49k* (*Klra11-ps*), such that *Ly49h* was deleted (**Fig 2A**). Flow cytometry confirmed the loss of  
106 Ly49A, Ly49C, Ly49G, and Ly49H expression. Ly49D expression was markedly decreased but its coding  
107 sequence was intact, suggesting an as yet unidentified locus control region within one of the deleted  
108 segments. We also generated single and compound *Ly49* deleted mice, detailed below (**Fig S1** and **Fig**  
109 **S2**). Predicted potential off-target sites were absent by PCR amplification and sequencing (**Table S1**). To  
110 further eliminate any off-target effects and genetic mosaicism, we backcrossed all CRISPR-Cas9 founder  
111 mice to WT B6 for two generations followed by additional crosses to KODO mice, then D8 (H2D<sup>d</sup>)  
112 transgenic mice, to generate the indicated homozygous *Ly49* knockout mice on the D8-KODO  
113 background.

114

115 MHC-restricted, NK cell-dependent resistance to  $\Delta$ m157-MCMV in D8-KODO mice was absent in  $\Delta$ Ly49-1  
116 D8-KODO mice (**Fig 2B**). Additionally, KODO mice with intact *Ly49s* complemented  $\Delta$ Ly49-1 D8-KODO  
117 mice as their F<sub>1</sub> hybrids showed fully restored  $\Delta$ m157-MCMV resistance (**Fig 2B**), indicating that  
118 heterozygous expression of Ly49A, Ly49C, Ly49G, Ly49H (**Fig S2**), deleted in  $\Delta$ Ly49-1, was sufficient for

119 resistance. Similarly, {(D8-KODO x KODO) F<sub>1</sub> hybrids} were also resistant (**Fig 2B**), indicating that H2D<sup>d</sup>  
120 heterozygosity is sufficient for antiviral protection when *Ly49* genes were intact.

121

### 122 **Inhibitory Ly49A and Ly49G receptors are required for H2D<sup>d</sup>-dependent resistance**

123 To decipher which Ly49 receptor(s) are involved in  $\Delta$ m157-MCMV resistance in D8-KODO mice, we first  
124 considered Ly49 activation receptors. However, a cross between resistant D8-KODO mice with  
125 susceptible B6 (H2<sup>b</sup>) mice generating heterozygosity for H2D<sup>d</sup> and H2<sup>b</sup> resulted in an intermediate  
126 infection phenotype (**Fig 2B**), highlighting an apparent role of MHC-I context for antiviral protection and  
127 contrasting MCMV resistance explained by Ly49 activation receptors when complete reversal was found  
128 in crossing susceptible and resistant mice [16,24,25]. Nonetheless, since  $\Delta$ Ly49-1 D8-KODO mice had low  
129 levels of Ly49D and lacked *Ly49h* and both receptors require DAP12 (and DAP10 to a lesser extent) for  
130 expression, including Ly49H-mediated resistance to MCMV, we evaluated the role of Ly49D and Ly49H  
131 by studying D8-KODO mice deficient in DAP10 and DAP12. For reasons not immediately clear, Ly49A,  
132 Ly49F and Ly49G expression was markedly decreased (**Fig S2**). Regardless, these mice were still resistant  
133 (**Fig 2C**), indicating that activation signals through DAP10/DAP12 are not required, consistent with the  
134 lack of involvement of NKG2D (**Fig 1E**) which also requires DAP10 or DAP12 for surface expression,  
135 depending on its isoform (**Fig S2**) [26]. Thus, Ly49 activation receptors are surprisingly not required for  
136 resistance to  $\Delta$ m157-MCMV in D8-KODO mice.

137

138 Having ruled out Ly49 activation receptors, we assessed Ly49 pseudogenes which could theoretically  
139 contribute to resistance by splicing events, which has been considered for other *Ly49* genes [27,28]. To  
140 test *Ly49m* (*Klra13-ps*), harboring a premature stop codon (third exon), we generated four independent  
141 CRISPR-Cas9 KO strains. When crossed to D8-KODO background, all four lines showed resistance to  
142  $\Delta$ m157-MCMV, indicating no apparent role for *Ly49m* (**Fig 2D**). Of the other remaining regions of the

143 *Ly49* cluster disrupted in the  $\Delta$ *Ly49-1* strain, we did not pursue *Ly49j*, *Ly49k* and *Ly49n* because they are  
144 predicted to encode severely truncated proteins, not expressed as receptors on NK cells [27].

145

146 We then turned our attention to *Ly49* inhibitory receptors. Since *Ly49C* and *Ly49I* reportedly have  
147 specificity for H2<sup>d</sup> [9,10], they could be relevant to  $\Delta$ *Ly49-1* D8-KODO mice which express *Ly49I* but not  
148 *Ly49C* (**Fig 2A**). However, lack of these two *Ly49s* in a new D8-KODO KO strain had no effect on H2D<sup>d</sup>  
149 resistance to  $\Delta$ m157-MCMV which remained entirely dependent upon NK cells (**Fig 2E**).

150

151 Finally, we evaluated the potential contribution of *Ly49A* and *Ly49G*, since both are deleted in  $\Delta$ *Ly49-1*  
152 mice and there are substantial data indicating that they both recognize H2D<sup>d</sup> [29,30]. In D8-KODO mice,  
153 *Ly49A* depletion had no significant change in viral titers while *Ly49G* depletion moderately increased  
154  $\Delta$ m157-MCMV levels (**Fig 3A**). Interestingly, depletion of both *Ly49A* and *Ly49G* led to a major loss of  
155 viral control, similar to complete NK cell depletion (**Fig 3A**), but *Ly49G* depletion results in approximately  
156 50% decrease of all NK cells (**Fig S2**). Nonetheless, *Ly49D* depletion, also affecting 50-60% of NK cells, did  
157 not alter viral resistance, suggesting a potential redundant contribution of *Ly49A* and *Ly49G*,  
158 independent of quantitative NK cell loss.

159

160 To definitively determine the role of *Ly49A* and *Ly49G* in resistance, we derived new *Ly49* KO strains on  
161 the D8-KODO background (**Fig S1** and **Fig S2**). While deletion of *Ly49A* alone was insufficient to reverse  
162 MCMV resistance, *Ly49G* depletion in these mice allowed MCMV titers higher than levels with *Ly49G*  
163 depletion in *Ly49A*-sufficient mice and similar to that with NK cell depletion (**Fig 3B**). Reciprocally, *Ly49G*  
164 KO mice were resistant and *Ly49A* depletion reversed resistance, again comparable to NK cell depletion  
165 (**Fig 3C**). Finally, we studied two mouse strains with knockouts of both *Ly49A* and *Ly49G* (*Ly49AG* KO)  
166 (**Fig S1**) which displayed relatively unchanged NK cell numbers, repertoire of other *Ly49s*, and



167 development (**Fig S2**). Infection of either Ly49AG KO strain resulted in viral titers similar to NK cell  
168 depletion of D8-KODO mice (**Fig 3D**) and lethality (**Fig 3E**). To provide additional evidence, we generated  
169 Ly49A knockin (KI) mice (into *Ncr1* on chromosome 7) which expressed Ly49A at near normal levels on  
170 all NKp46<sup>+</sup> NK cells (**Fig S3**).  $\Delta$ Ly49-1 Ly49A KI D8-KODO mice demonstrated NK-cell dependent  
171 resistance to  $\Delta$ m157-MCMV, unlike susceptible parental  $\Delta$ Ly49-1 D8-KODO mice, showing  
172 complementation by Ly49A (**Fig 3F**). Therefore, Ly49A and Ly49G act redundantly in H2D<sup>d</sup> mice to  
173 promote NK cell-dependent resistance to  $\Delta$ m157-MCMV, unequivocally establishing the protective role  
174 of inhibitory Ly49 receptors in NK cell-dependent viral control.

175

#### 176 **NK cell licensing and missing-self rejection both require Ly49A and Ly49G receptors in D8-KODO mice**

177 To further delineate the potential mechanism for MHC-restricted viral resistance, we investigated  
178 whether loss of Ly49A and Ly49G would have an impact on NK cell licensing by stimulating NK cells from  
179 D8-KODO, Ly49AG KO D8-KODO, and TKO (KODO  $\beta$ 2m<sup>-/-</sup>) mice with plate-bound anti-NK1.1 for  
180 interferon gamma production [11]. Remarkably, the total NK cell pool in Ly49AG KO D8-KODO mice  
181 exhibited significantly reduced IFN-gamma production compared to D8-KODO NK cells and similar to  
182 unlicensed NK cells from TKO mice (**Fig 4A, B**). These results strongly suggest that Ly49A and Ly49G are  
183 required for NK cell licensing through H2D<sup>d</sup>.

184

185 We next tested whether loss of inhibitory Ly49s would affect missing-self recognition *in vivo* as  
186 suggested by *in vitro* studies [5,31] and anti-Ly49 antibody experiments *in vivo* [32]. Upon injection,  
187 labelled KODO (MHC-I-deficient) splenocytes were effectively cleared in D8-KODO mice that were either  
188 WT, or lacked only Ly49A or only Ly49G (**Fig 4C, S4**), in an NK cell-dependent manner as shown by NK  
189 cell depletion (**Fig S4A, B**). Importantly,  $\Delta$ Ly49-1 D8-KODO mice and Ly49AG KO D8-KODO mice were  
190 unable to reject KODO targets while complementation of  $\Delta$ Ly49-1 D8-KODO mice with Ly49A KI restored

191 this capacity. Thus, these results strongly suggest Ly49A and Ly49G are redundant missing-self receptors  
192 in D8-KODO mice as they enable NK cells to reject missing-self targets through NK cell licensing.

193

#### 194 **Inhibitory Ly49s mediate protection from $\Delta$ m157-MCMV is ITIM-dependent**

195 We recently generated KI mice carrying Ly49A with a non-functional ITIM (termed Ly49AYF),  
196 demonstrating that effector inhibition and licensing are both mediated by the Ly49A ITIM [31]. Ly49AYF  
197 D8-KODO mice were resistant to  $\Delta$ m157-MCMV (**Fig 4D**) similar to D8-KODO mice but, in contrast to D8-  
198 KODO mice (**Fig 3A, B**), Ly49G depletion led to significantly elevated viral titers, similar to anti-NK1.1  
199 depletion (**Fig 4D**). These data also mirror Ly49G depletion of Ly49A-KO D8-KODO mice (**Fig 3B**),  
200 suggesting that Ly49A mediates resistance to  $\Delta$ m157-MCMV in an ITIM-dependent manner. We also  
201 observed that Ly49G-depleted Ly49AYF D8-KODO mice were unable to reject missing-self targets,  
202 indicating that the ITIM is required for Ly49A to mediate missing-self recognition *in vivo* (**Fig S4**). These  
203 findings strongly suggest that Ly49A mediates resistance to  $\Delta$ m157-MCMV in an ITIM-dependent  
204 manner.

205

#### 206 **MCMV infection generates targets for missing-self rejection**

207 We next investigated the mechanism by which  $\Delta$ m157-MCMV might contribute to the Ly49 effects. We  
208 initially focused on two MCMV immunoevasins known to downmodulate MHC-I, *m06* and *m152*, [33]  
209 although they have variable effects dependent upon MHC-I alleles [34]. To establish their relevance  
210 here, we first infected SV40-immortalized D8-KODO MEFs with a GFP-expressing  $\Delta$ m157-MCMV,  
211 indicating that H2D<sup>d</sup> was down-regulated in GFP-positive infected cells (**Fig 5A, B**). Next, we produced  
212 mutant  $\Delta$ m157-GFP viruses deficient for either *m06*, *m152*, or both. Remarkably, H2D<sup>d</sup> downmodulation  
213 was completely abrogated only when both *m06* and *m152* were targeted (**Fig 5A, B**). In contrast, WT  
214 *m152* ( $\Delta$ m06 $\Delta$ m157 MCMV) or WT *m06* ( $\Delta$ m152 $\Delta$ m157 MCMV) decreased surface expression of H2D<sup>d</sup> in

215 infected cells, consistent with virus-free overexpression systems demonstrating that both *m06* [35] and  
216 *m152* [36] redundantly promote MHC down-regulation.  
217  
218 D8-KODO mice heterozygous for H2D<sup>d</sup> (**Fig 2B**) displayed H2D<sup>d</sup> expression at an MFI of nearly 50% of  
219 homozygous mice (**Fig 5C**), comparable to the loss seen during *in vitro* MCMV infection (**Fig 5A, B**). There  
220 was a similar level of H2D<sup>d</sup> expression in (BALB/c x B6)<sub>F1</sub> hybrid mice, confirming that physiologically  
221 relevant levels of H2D<sup>d</sup> were being assessed, both *in vitro* and *in vivo*. Indeed, heterozygous D8 targets in  
222 uninfected homozygous D8-KODO mice were protected from clearance following a 3hr (**Fig 5D**) or 24hr  
223 (**Fig 5E**) *in vivo* cytotoxicity assay. In contrast, KODO targets were completely eliminated at both 24hrs  
224 (**Fig 5E**) and 48hrs (**Fig 4C**), and partially eliminated at 3hrs after injection (**Fig 5D**). During MCMV  
225 infection, there was enhanced clearance of both MHC-null and MHC-heterozygous targets at all times  
226 post-infection (**Fig 5D**), consistent with our previous study, where we identified a role for cytokines  
227 modulating missing-self rejection during MCMV infection [37]. While heterozygous target cell rejection  
228 never reached levels seen with MHC-null targets, NK cell-dependent clearance of missing-self targets  
229 can discriminate between normal levels and partial down-regulation of MHC molecules in the context of  
230 MCMV infection.

231

232 **Deletion of MCMV genes *m06* and *m152* prevents NK-dependent clearance while enhancing CD8<sup>+</sup> T**  
233 **cell-dependent protection**

234 To determine if *m06* and *m152* perturb NK-dependent viral resistance, we generated an independent  
235 set of  $\Delta m152$ -MCMV stocks in a virulent MCMV strain with mutations in both *m06* and *m152*, termed  
236  $\Delta m152/\Delta m06/\Delta m152$ -MCMV.  $\Delta m152$ -MCMV and  $\Delta m152/\Delta m06/\Delta m152$ -MCMV showed similar rates of  
237 *in vitro* growth and viral titers, though  $\Delta m152$ -MCMV had a slight advantage (**Fig S6**). Regardless,  
238 infection of *Rag1*<sup>-/-</sup> mice on the B6 background indicated that both viruses had comparable replication

239 *in vivo* (**Fig 5F**). By contrast,  $\Delta m157/\Delta m06/\Delta m152$ -MCMV infection of B6 and  $\Delta Ly49-1$  D8-KODO mice,  
240 otherwise susceptible to  $\Delta m157$ -MCMV (**Fig 1B, 2B**), resulted in a resistant phenotype (**Fig 5F, 5G**). D8-  
241 KODO mice were also resistant to  $\Delta m157/\Delta m06/\Delta m152$ -MCMV but resistance was not dependent on  
242 NK cells (**Fig 5G**), contrasting their NK cell-dependent resistance to  $\Delta m157$ -MCMV (**Fig 1C**). Instead, CD8  
243 depletion significantly reversed resistance to  $\Delta m157/\Delta m06/\Delta m152$ -MCMV (**Fig 5G**), unlike the absence  
244 of an effect on resistance to  $\Delta m157$ -MCMV (**Fig 1C**).

245

## 246 Discussion

247 Here, we clearly demonstrate that specific NK cell Ly49 inhibitory receptors have a critical MHC-  
248 restricted role in controlling viral infection *in vivo* (**Fig S7**). Their role is dependent on their specificity for  
249 self-MHC-I that influences their effects on NK cell licensing. Viral modulation of MHC-I was required  
250 because when MHC-I was no longer down-regulated, early resistance was due to CTLs instead of NK  
251 cells. Both the host (*Ly49a* and *Ly49g*) and the virus (*m06* and *m152*) encode multiple molecules  
252 involved in this resistance, a redundancy highlighting the ongoing arms race between the host and  
253 pathogen, and providing definitive support for the missing-self hypothesis.

254

255 In other strains of mice, there are likely differences in the NK cell response to MCMV due to Ly49  
256 polymorphisms, particularly their specificities for MHC-I, and receptor repertoire, including subset  
257 distribution. Similarly, hosts may have different MHC-I alleles with varying capacities to license NK cells  
258 and susceptibilities to downregulation by viral MHC-I inhibitors. These factors likely account for  
259 differences in the MHC-restricted phenotypes described here. Moreover, there appears to be activation  
260 receptors, akin to Ly49H in B6 mice, which may dominate NK cell function if their ligands are expressed  
261 on infected cells, in which case licensed NK cells may play a secondary role. Finally, MCMV itself has  
262 evolved alleles of its ORFs that modulate these processes.

263

264 Our studies suggest that MCMV should encode molecules to specifically inhibit licensed NK cells. Indeed,  
265 MCMV-encoded m157 can engage Ly49 inhibitory receptors in mouse strains that do not have Ly49H  
266 activation receptor-equivalents; *e.g.* Ly49I in 129 mice [15] and Ly49C in BALB/c [20]. We predict that  
267 m157 inhibition of NK cell function will depend on whether these inhibitory receptors are in hosts with  
268 appropriate MHC-I alleles for licensing. Indeed, m157 effects on inhibiting NK cell control appear to be  
269 MHC-dependent [20], suggesting such potential interactions. Moreover, MCMV has 11 ORFs with  
270 predicted MHC-I folds [38], some of which have been verified by crystallographic studies, and thus may  
271 be similarly involved in modulating NK cells. Prior findings have suggested that upon downmodulation of  
272 MHC-I via m06 and m152, a third immunoevasin (m04) acts to stabilize certain MHC-I alleles on the  
273 surface of infected cells, leading to NK cell-dependent resistance, depending on additional activation  
274 receptors [19]. However, our studies do not show an apparent role for m04, indicating the MHC-I-  
275 restricted, inhibitory NK cell receptor-dependent anti-viral effects described here are fundamentally and  
276 mechanistically different from prior reports.

277

278 Beyond viral control, our studies also establish that Ly49 inhibitory receptors play a critical role in  
279 missing-self rejection, as previously predicted, based on *in vitro* observations and mice with global  
280 defects in MHC-I expression that have unlicensed NK cells. Here we clearly show that absence of specific  
281 inhibitory Ly49 receptors in a mouse expressing MHC-I results in unlicensed NK cells and an inability to  
282 perform missing-self rejection. It should be noted that prior studies of Ly49 specificities were often  
283 dependent on overexpression systems that may not reflect physiological interactions. Understanding of  
284 these ambiguities will be aided by the Ly49 KO mice described here as well as complementation by  
285 restoring expression of a single Ly49 receptor. Taken together, these data also provide definitive  
286 evidence that the inhibitory receptors are required for missing-self rejection *in vivo*.

287

288 As in viral control, NK cell effects on tumor control greatly rely on both NK cell activation and inhibitory  
289 receptor signaling [39]. MHC-I downmodulation during tumor growth to evade CTLs provides an  
290 attractive target for oncogenic control, yet the *in vivo* requirements for this potential critical function  
291 are poorly understood. Indeed, we recently showed that missing-self rejection in a mouse with inducible  
292  $\beta 2m$  deletion is markedly enhanced by inflammatory stimuli, such as MCMV infection, otherwise  
293 licensed NK cells can lose the licensed phenotype when profound MHC-I deletion occurs [37], consistent  
294 with results reported here. Therefore, our studies on NK cell control of viral infection, demonstrating of  
295 the complex *in vivo* interaction between inhibitory receptors and self-MHC-I, can serve as an analogous  
296 framework for considering how to modulate NK cells for controlling cancer.

297 **Methods**

298 **Mice**

299 C57BL/6Ncr (B6) and BALB/cAnNCr (BALB/c) mice were purchased from Charles River  
300 Laboratories. C57BL/10SnJ (B10; 000666), B10.D2/nSnJ (B10.D2; 000666), Prf1<sup>-/-</sup> (002407) and RAG1<sup>-/-</sup>  
301 (002216) strains were purchased from Jackson Laboratory. DAP10<sup>-/-</sup>DAP12<sup>-/-</sup> mice were provided by T.  
302 Takai [40]. NKG2D<sup>-/-</sup> mice were obtained from Bolan Polic (University of Rijeka, Croatia) [23]. Granzyme  
303 B KO mice were obtained from T. Ley (Washington University, St. Louis) [41]. H2K<sup>b/-/</sup> H2D<sup>b/-/</sup> (KODO)  
304 mice were purchased from Taconic Farms. Triple knockout (TKO) mice which are H2K<sup>b/-/</sup> H2D<sup>b/-/</sup> and lack  
305 β2m were obtained from Dr. Ted Hansen (Washington University, St. Louis). D8 transgenic mice  
306 expressing an H2D<sup>d</sup> genomic construct [42] were provided by D. Marguiles (National Institute of Allergy  
307 and Infectious Diseases, Bethesda, MD). D8-KODO mice were generated by crossing D8-transgenic mice  
308 to KODO mice. Generation and characterization of the ITIM-mutant AYF mice on the H2<sup>d</sup> background  
309 have been previously described [31]. KLRA7<sup>em1(IMPC)J</sup> (Ly49G KO) mice on the C57BL/6NJ background were  
310 purchased from the Jackson Laboratory (027444); this allele was generated at the Jackson Laboratory by  
311 CRISPR-Cas9 injection of Cas9 RNA and 3 gRNAs: TCTTGACTTGTGCATAACC, CAGTCCTCACTAGTTTCTGC  
312 and GACATGGACTGACCAAATT resulting in a 241 bp deletion beginning in 5-prime upstream sequence  
313 and ending within exon 1. Additional strains of mice generated through CRISPR-Cas9 are described  
314 below. All mice, with the exception of the RAG<sup>-/-</sup> strain, used in these studies were initially obtained or  
315 generated on the B6 genetic background and later backcrossed to the KODO and then D8-KODO  
316 background (H2D<sup>d</sup> MHC). B6 mice used in experiments were obtained directly from Charles River  
317 Laboratories. All other experimental and control mice were bred in-house at Washington University.  
318 Mice were 8–14-wk old at the start of experiments unless otherwise stated. Male and/or female mice  
319 were used in individual experiments without blinding or randomization. This study was carried out in  
320 strict accordance with the recommendations in the Guide for the Care and Use of Laboratory Animals of

321 the National Institutes of Health. The studies were approved by the Animal Studies Committee at  
322 Washington University School of Medicine under animal protocol 20180293.

323

#### 324 **Development of CRISPR-Cas9 modified knock-out mice**

325 While NCBI BLAST (<http://blast.ncbi.nlm.nih.gov/>) was initially used to assess sequence similarity of  
326 potential sgRNAs, GT-Scan (<https://gt-scan.csiro.au/gt-scan>) [43] and CCTop ([https://crispr.cos.uni-  
327 heidelberg.de/](https://crispr.cos.uni-heidelberg.de/)) [44] were primarily used to confirm the correct and specific targeting our sgRNA  
328 designs. The sequences of synthetic guide RNAs (sgRNA) and the strains of mice generated are shown  
329 in **Table S1**. Cas9 mRNA and sgRNA synthesis, RNA micro-injection into zygotes is identical to what we  
330 described earlier [45]. Specifically, we used 20ng of each guide when multiple guides were indicated,  
331 and 100ng of Cas9 mRNA. Pups were screened for *Ly49* gene disruption at birth by PCR. If multiple *Ly49*  
332 alleles were present, they were separated by one backcross to B6 and re-screened by PCR. All mice with  
333 in-frame insertions or deletions (indels) were excluded from further analysis. Multiple lines with out-of-  
334 frame indels were chosen for downstream characterization. These genetic lesions were verified by  
335 absence of PCR amplicons for each of the indicated *Ly49* genes in homozygous mice, and specific PCR  
336 amplicons for the deleted genomic regions, that were sequenced to determine the exact breakpoints  
337 (**Fig S1** and **Fig S2**). Finally, *Ly49* protein expression was examined, where antibodies were available, at 8  
338 weeks in homozygous mice following at least one additional backcross to parental B6. Since all sgRNAs  
339 targeted the second exon of *Ly49* genes, we focused on this exon to specifically interrogate on-target  
340 and off-target analysis. As shown in **Fig S1**, all exons and the sgRNA with on-target and off-target  
341 potential are depicted. Sanger sequence traces of homozygous mice are shown below the schematic.  
342 Flow analysis across genes expressed within the NKC in D8-KODO mice is presented as **Fig S2**.  
343 Specifically, we generated *Ly49C/I*-double-deficient mice (two lines; one used in experiments), *Ly49m*-  
344 deficient mice (four lines used in experiments), *Ly49A*-deficient mice (two lines used in experiments),



345 Ly49A/G-double-deficient mice (two lines used in experiments), and the  $\Delta$ Ly49-1 D8-KODO multi-  
346 deficient mice (one line used in experiments). The Ly49G-deficient mice were purchased from Jackson  
347 Laboratory, however, full on-target, off-target (**Fig S1**) and flow cytometric (**Fig S2**) analyses was  
348 performed by our laboratory. Importantly, no major impact on maturation was observed in any of these  
349 mice.

350

### 351 **Development of CRISPR-Cas9 modified Ly49A knockin mice**

352 The NKp46 (*Ncr1*) locus was chosen for insertion of the *Ly49A* cDNA (**Fig S3**). The donor construct was  
353 designed to replace the stop codon of NKp46 (while maintaining the 3-prime untranslated region) with a  
354 P2A peptide-cleavage site upstream of the *Ly49A* cDNA obtained from reverse transcription of Ly49A-  
355 expressing B6 NK cells. The result is that Ly49A expression would be restricted to all NK cells. Given that  
356 the *Ly49A* knockin is located on chromosome 7, we were able to cross this mouse with the  $\Delta$ Ly49-1  
357 mouse with Ly49 deletions on chromosome 6 without linkage restrictions. GT-Scan [43] and CCTop [44]  
358 were primarily used to confirm the correct and specific targeting our sgRNA to the NKp46 locus. The  
359 sequences of guide RNAs are shown in **Table S1**. Cas9 mRNA and sgRNA synthesis, RNA and donor DNA  
360 micro-injection is identical to what we described earlier [45]. Specifically, we used 10ng of donor DNA,  
361 20ng of each guide (2 total), and 100ng of Cas9 mRNA. Pups were screened for the donor DNA by PCR  
362 soon after birth and maintained as heterozygotes for flow-based confirmation at 8 weeks. After two  
363 rounds of B6 backcrossing, the mice were bred to  $\Delta$ Ly49-1 D8-KODO. Mice homozygous for the NKC  
364 deletion but heterozygous for the Ly49A knockin were screened for expression of Ly49A (**Fig S3**).  
365 Subsequently, various NKC surface molecules were analyzed by flow cytometry (**Fig S2**). Again, no major  
366 impact on maturation was observed.

367

368 **Development of CRISPR-Cas9 modified MCMV**

369  $\Delta$ m157-MCMV and GFP-expressing MCMV were modified to knock-out various viral ORFs using CRISPR-  
370 Cas9 editing to obviate the need for bacterial artificial chromosome modification. The GFP-expressing  
371 MCMV was a generous gift from S.C. Henry and J. Hamilton (Duke University, Durham, NC, USA) [46] and  
372 previously described by our lab to harbor a non-functional *m157* gene [47]. The GFP-expressing MCMV  
373 and CRISPR-derived progeny were used in *in vitro* studies while the  $\Delta$ m157-MCMV derived from WT1  
374 [48] and its CRISPR-modified progeny were used in the *in vivo* analyses. CCTop [44] was used to identify  
375 and confirm specific targeting our sgRNAs to the MCMV ORFs. The stand-alone version of CCTop was  
376 loaded with the MCMV genome (GenBank Accession GU305914.1) to effectively eliminate off-target  
377 cleavage potential. The table of all possible guide site for MCMV is provided (**Table S2**). The pX330  
378 vector [49,50] was obtained from Addgene and modified by replacing the *SbfI-PsiI* site with the Neo  
379 marker (*SbfI-HinII* fragment) from pCDNA3. The oligonucleotide duplexes containing single sgRNAs  
380 specific for MCMV *m06* or *m152* (**Table S3**) were cloned into this vector that was subsequently  
381 transfected into SV40-immortalized B6 MEFs with G418 selection. Parental virus was used to infect  
382 these sgRNA and Cas9-expressing MEFs at a low MOI (0.1). Once confluent lysis was observed, viral  
383 supernatants were used to reinfect B6 MEFs, individual plaques were picked, and sequence variants  
384 were confirmed (**Fig S5**). For double-deficient MCMV ORF knockouts, a pure stock of virus (e.g. *m06*  
385 knockout) was used to infect MEFs expressing Cas9 and the alternate sgRNA of interest (e.g. *m152*). For  
386 *in vivo* analysis, plaque-purified virus was used to generate salivary gland passaged stocks in BALB/c  
387 mice as described above. Salivary gland-derived MCMV lacking *m06*, *m152*, and *m157* was compared to  
388 MCMV lacking *m157* in a multi-step growth curve on NIH 3T12 (ATCC CCL-164) fibroblasts (MOI = 0.1).  
389 Viral genome copies quantified from cell lysates and culture supernatants, as previously described [51],  
390 demonstrated that replication of the triple knock-out virus was unimpaired yet delayed slightly in overall  
391 growth (**Fig S6**).

392

393 **Viral infection and quantification**

394 The salivary gland propagated MCMV stocks were generated from purified and sequenced clones. Virus  
395 was inoculated via the intraperitoneal (IP) route in a total volume of 200 $\mu$ l PBS at a dose of 40,000  
396 plaque forming units (pfu) per mouse for WT-MCMV and 20,000 pfu per mouse for m157-deficient  
397 MCMV [51] ( $\Delta$ m157-MCMV) and  $\Delta$ m157/m06/m152-MCMV for determination of splenic titers at day 4.  
398 Viral titers from infected spleens were quantified as a ratio of MCMV IE DNA to host beta-actin DNA  
399 using real-time PCR and Taqman probes as previously described [51]. When shown, individual data  
400 points represent a single mouse. Survival analysis endpoints were determined as either death or >20%  
401 weight loss from starting weights, using 300,000 pfu of  $\Delta$ m157-MCMV per mouse. To examine H2D<sup>d</sup>  
402 MHC-I downmodulation, SV40-immortalized D8-KODO MEFs were infected with GFP-expressing MCMV  
403 at an MOI of 1 for 24 hours and subsequently released from plates with Versene (Thermo Fisher,  
404 Waltham, MA) prior to antibody staining and flow cytometric analysis.

405

406 **Antibody depletions**

407 Purified 3D10 ( $\alpha$ -Ly49H), PK136 ( $\alpha$ -NK1.1), JR9 ( $\alpha$ -Ly49A), 4E5 ( $\alpha$ -Ly49D), LGL-1 ( $\alpha$ -Ly49G) and YTS-169  
408 ( $\alpha$ -CD8 $\alpha$ ) were obtained from hybridomas purified by the Rheumatic Diseases Core Center Protein  
409 Purification and Production Facility (Washington University). Antibodies were injected IP at a dose of  
410 200 $\mu$ g per mouse 48 hours prior to infection. >98% depletion was confirmed via flow cytometry in a  
411 subset of treated mice. Injection of PBS alone was used as a control where indicated.

412

413 **Antibodies and Flow Cytometry**

414 The following antibodies and reagents were purchased from eBioscience: anti-CD3e (145-2C11), anti-  
415 CD19 (eBio1D3), anti-NK1.1 (PK136), anti-NKp46 (29A1.4), anti-CD27 (LG.7F9), anti-CD11b (M1/70), anti-

416 Ly49D (eBio4E5), anti-Ly49E/F (CM4), anti-Ly49G2 (eBio4D11), anti-Ly49H (3D10), anti-Ly49I (YLI-90),  
417 anti-CD94 (18d3), anti-NKG2A<sup>B6</sup> (16a11), anti-IFN- $\gamma$  (XMG1.2), anti-CD122 (5H4), anti-CD127 (SB/199),  
418 anti-CD69 (H1.2F3), anti-2B4 (2B4), anti-NKG2D (CX5) and Fixable Viability Dye eFluor 506. The following  
419 antibodies and reagents were purchased from BD Biosciences: anti-Ly49F (HBF-719), anti-Ly49G2  
420 (4D11), and streptavidin (SA)-phycoerythrin. The following antibodies and reagents were purchased  
421 from BioLegend: anti-NK1.1 (PK136), anti-H2D<sup>d</sup> (34-2-12) and SA-allophycocyanin. Anti-Ly49I (YLI-90)  
422 was purchased from Abcam. Anti-Ly49A (JR9) was purified in our laboratory from hybridoma  
423 supernatants and subsequently conjugated to biotin or FITC. The JR9 hybridoma was generously  
424 provided by Jacques Roland (Pasteur Institute, Paris, France) [52]. Anti-Ly49C (4LO33) [53] was purified  
425 in our laboratory from hybridoma supernatants and subsequently conjugated to biotin. The 4LO  
426 hybridoma was generously provided by Suzanne Lemieux (Institut National de la Recherche Scientifique-  
427 Institut Armand-Frappier, Laval, Quebec, Canada). Anti-NK1.1 (PK136) was purified in our laboratory  
428 from hybridoma supernatants. The PK136 hybridoma was purchased from American Type Culture  
429 Collection. Fc receptor blocking was performed with 2.4G2 (anti-Fc $\gamma$ RII/III) hybridoma (American Type  
430 Culture Collection) culture supernatants. Surface staining was performed on ice in staining buffer (1%  
431 BSA and 0.01% Na<sub>3</sub>N in PBS). Samples were collected using a FACSCanto (BD Biosciences), and data  
432 were analyzed using FlowJo (TreeStar).

433

#### 434 ***In vivo* cytotoxicity**

435 Mice used for donor splenocytes in *in vivo* cytotoxicity assays were 8–12 weeks old at the time of  
436 transfer. WT-MCMV, where indicated, was inoculated 3 days prior at a dose of 10,000 pfu per mouse  
437 [51]. Donor splenocytes were harvested and labeled *in vitro* with 2.5  $\mu$ M CFSE (Life Technologies) and 5  
438 or 0.2  $\mu$ M CellTrace violet (CT violet; Thermo Fisher). Recipient mice were injected intravenously with 2  
439  $\times 10^6$  of each donor. Spleens from recipient mice were harvested 3 (**Fig 5B**), 24 (**Fig 5C**) or 48 (**Fig 4C, Fig**

440 **S4)** hours after transfer of donor cells. NK cell-specific rejection was calculated by gating on transferred  
441 CFSE-positive cells and excluding dead cells by forward scatter and side scatter. Rejection was quantified  
442 as Killing Percentage =  $[1 - (\text{Target}/\text{Control})/(\text{Target}/\text{Control})_{\text{Average(NK depleted)}}] \times 100$ , where the  
443 target was the MHC-deficient (H2D<sup>d-/-</sup>) or heterozygous (H2D<sup>d+/-</sup>) donor cell and the control was a H2D<sup>d+/+</sup>  
444 donor cell. The ratio of target to control cells was normalized to the average ratio recovered from NK  
445 cell-depleted mice to calculate rejection by NK cells.

446

#### 447 **NK cell in vitro stimulation and intracellular cytokine staining**

448 Splenocytes were stimulated with anti-NK1.1 (PK136) as previously described [11]. Briefly, 24-well  
449 culture plates were coated with 500  $\mu\text{L}$  of purified PK136 (1  $\mu\text{g}/\text{mL}$ ). Plates were washed with PBS, and 5  
450  $\times 10^6$  splenocytes were then added to each well in 500  $\mu\text{L}$  of R10 (RPMI 1640 supplemented with 10%  
451 fetal bovine serum) media. Splenocytes were stimulated in parallel with 0.5  $\mu\text{g}/\text{mL}$  PMA (Sigma-Aldrich)  
452 and 4  $\mu\text{g}/\text{mL}$  ionomycin (Sigma-Aldrich) and incubated at 37 °C and in 5% CO<sub>2</sub> for a total of 7 h. Brefeldin  
453 A (GolgiPlug; BD Biosciences) was added to the cells after 1 h. After staining surface antigens, cells were  
454 fixed and permeabilized (Cytofix/Cytoperm; BD Biosciences) followed by staining for IFN- $\gamma$ . NK cells were  
455 gated as viable CD3<sup>-</sup> CD19<sup>-</sup> NKp46<sup>+</sup> lymphocytes.

456

#### 457 **Sequence analysis**

458 PCR amplicons were amplified with the Phusion high-fidelity DNA polymerase (NEB, Ipswich, MA) using  
459 manufacturer recommended cycling conditions, column purified (Macherey-Nagel, Bethlehem, PA) and  
460 were sequenced on an ABI 3730 at Genewiz, Inc (South Plainfield, NJ, USA). The resulting  
461 chromatograms were aligned using SnapGene software (GSL Biotech, Chicago, IL) and the relevant  
462 reference sequences for MCMV (GenBank Accession GU305914.1) or the C57BL/6 (GRCm38/mm10). All  
463 oligonucleotides were synthesized by IDT (Coralville, IA).

464

465 **Statistical analysis**

466 Statistical analysis was performed using Prism (GraphPad software). Unpaired, two-tailed Student's t-  
467 tests were used to determine statistically significant differences between experimental groups. For all t-  
468 tests, the number of degrees of freedom (df) equals the total sample size minus 2. Error bars in all  
469 figures represent the standard error of the mean (SEM). \*\*\*\* $p < .0001$ , \*\*\* $p < .001$ , \*\* $p < .01$ , \* $p < .05$ ,  
470 ns = not significant.

471

472 **Data and biological material availability**

473 The data that support the findings of this study are available from the corresponding authors on  
474 reasonable request. Novel cell lines, viral constructs, and mouse strains are available from the  
475 author's laboratory (W.M.Y.) upon request.

476

477 **Acknowledgments**

478 We thank J. Michael White (Transgenic, Knockout, and Micro-Injection Core at Washington University)  
479 for CRISPR/Cas9 injections and Andrew Cao, Trenton J (TJ) Dawson, and Darryl Higuchi for technical  
480 assistance. Experimental support was provided by the Protein Production and Purification Core Facility.  
481 This work was supported by National Institutes of Health grants R01AI129545 and R01AI131680 (to  
482 W.M.Y) and K08-AI104991 (to B.A.P.)

483

484 **Author contributions**

485 B.A.P and W.M.Y designed the research. B.A.P., M.D.B., S.J.P., L.Y., D.L.B., and J.P.-L. performed the  
486 experiments. B.A.P and W.M.Y analyzed the data and wrote the paper.

487 **The authors declare no competing financial interests.**

488 **Figure Legends**

489 **Fig 1. H2<sup>d</sup>-dependent protection against MCMV lacking m157 requires cytotoxic NK cells.**

490 Splenic viral titers in mice depleted of total NK cells, CD8<sup>+</sup> T-cells, or where Ly49H<sup>+</sup> receptors on NK cells  
491 were blocked. Data represent a composite of two independent experiments with 3-7 mice per group  
492 with individual points representing a single mouse using (A) H2<sup>b</sup>-expressing B10 mice, (B) B10 and H2<sup>d</sup>-  
493 expressing B10.D2 mice, (C) H2D<sup>d</sup>-expressing (D8-KODO) mice, (D-F) D8-KODO mice with wild-type,  
494 heterozygous, or no expression of (D) perforin (*Prf1*), (E) granzyme B (*Gzmb*), and (F) NKG2D (*Klrk1*).

495

496 **Fig 2. NK cell resistance to Δm157-MCMV requires specific Ly49 receptors.**

497 (A) The CRISPR sgRNA used for targeting is shown; PAM site underlined, 10nt core in yellow. Mismatches  
498 between the sgRNA and targeted *Ly49s* are represented below the guide. B6 *Ly49* cluster with the  
499 number of predicted mismatches shown below. Loss of genetic regions is indicated as a red dashed line;  
500 flow cytometry histograms indicate wild-type D8-KODO (shaded) and ΔLy49-1 D8-KODO (solid line) NK  
501 cell expression. (B-E) Δm157-MCMV splenic titers; data represent a composite of at least two  
502 independent experiments with 3-7 mice per group: (B) D8-KODO, ΔLy49-1 D8-KODO and the indicated  
503 F1 mice; (C-E) D8-KODO mice (C) lacking DAP10 and DAP12, (D) with *Ly49m* deletions and (E) lacking  
504 Ly49C and Ly49I.

505

506 **Fig 3. Ly49G and Ly49A are required for H2D<sup>d</sup>-dependent Δm157-MCMV resistance.**

507 (A-D, F) Δm157-MCMV splenic titers; data represent a composite of multiple independent experiments,  
508 as noted, with 3-7 mice per group with individual points representing a single mouse. Mice used were  
509 (A) D8-KODO, five experiments; and (B) two lines lacking Ly49A (black vs. red), three experiments; (C)  
510 Ly49G knockout mice, representative of two experiments; (D) two lines lacking Ly49A and Ly49G, five

511 experiments; (F) and  $\Delta$ Ly49-1 D8-KODO with or without the Ly49A knockin, two experiments. (E)

512 Composite survival analysis of D8-KODO and Ly49A/G knockout mice; two experiments.

513

514 **Fig 4. NK cell licensing and missing-self rejection in D8-KODO mice both require Ly49A and Ly49G.**

515 (A) Representative histogram plots depicting the frequency of interferon gamma positive (IFN $\gamma$ +) NK

516 cells following NK1.1 stimulation in D8-KODO, Ly49A/G KO mice, and TKO (KODO  $\beta$ 2m KO) mice. (B)

517 Composite plot of IFN $\gamma$ + frequencies from (A); two independent experiments with 3 mice per group. (C)

518 *In vivo* cytotoxicity of KODO or D8-KODO splenocytes. Data are cumulative over two independent

519 experiments with 4-5 recipient mice per group. (D)  $\Delta$ m157-MCMV infection as in **Fig 2B**; three

520 independent experiments.

521

522 **Fig 5. Down-regulation of H2D<sup>d</sup> through *m06* and *m152* affects host MCMV control.**

523 (A,B) 24hr *in vitro* infection and flow cytometric evaluation of D8-KODO MEFs with GFP-expressing

524 MCMV lacking the indicated ORFs; representative of two independent infections. (C) MFI of H2D<sup>d</sup> in

525 mice homozygous and heterozygous for the D8 transgene (*left*), compared to BALB/c (H2<sup>d/d</sup>) and BALB/c

526 x B6 F1 (H2<sup>b/d</sup>) mice (*right*); representative of two independent experiments. (D) 3 hr or (E) 24 hr *in vivo*

527 cytotoxicity with KODO or D8-KODO heterozygous (D8-Het; H2D<sup>d+/-</sup>) donor cells. Composite of (E) one or

528 (D) two independent experiments. (F)  $\Delta$ m157 or  $\Delta$ m157/*m06*/*m152* MCMV infection of B6 or *Rag1*<sup>-/-</sup> and

529 (G) D8-KODO or  $\Delta$ Ly49-1 D8-KODO mice.



Supplementary Information

**Fig S1.** Characterization of on-target and off-target CRISPR deletions targeting specific *Ly49* genes.

**Fig S2.** Flow cytometric characterization of CRISPR-Cas9 modified mice.

**Fig S3.** Strategy and characterization of the NKp46-Ly49A knockin.

**Fig S4.** *In vivo* cytotoxicity in Ly49AG KO and Ly49AYF mice.

**Fig S5.** Sanger sequence analysis of *m06* and *m152* in CRISPR-modified MCMV strains.

**Fig S6.** Multi-step growth curve

**Fig S7.** Model for MHC-restricted and Ly49 receptor-dependent MCMV resistance.

**Table S1.** sgRNA used in generation of CRISPR-Cas9 modified mice

**Table S2.** List of MCMV sgRNA target sites

**Table S3.** sgRNAs specific for MCMV *m06* or *m152*

**Table S4.** The primers used for *Ly49* gene sequence analysis

**Table S5.** The primers used for MCMV *m06* and *m152* gene sequence analysis

## Supplementary Figure Legends

### Fig S1. Characterization of on-target and off-target CRISPR deletions targeting specific *Ly49* genes.

Genomic DNA was isolated from back-crossed H2D<sup>d</sup> CRISPR-Cas9 modified mice used in these studies.

The specific CRISPR-targeted exons (those with homology to the ITIM) were Sanger sequenced as representative of the most likely position of off-target effects and to confirm and characterize the

frameshift in on-target variants. The primers used for PCR and subsequent sequence analysis are shown

in **Table S4**. (A-P) Each panel depicts the reference sequence (above), the region of the exon targeted (in

blue), the on-target and off-target guide sites (in purple), and the Sanger alignments (below) for the

mice indicated. Mice are designated as to which strains (in parentheses) were analyzed. B6 is the wild-

type genome for comparison. Red boxes indicate indels (inserted nucleotides are shown, while deleted

bases are represented as a dash). Sequence analysis was confirmed in both the forward and reverse

directions, however, for clarity only one direction is shown. Sequences assessed in each panel are as

follows: (A) *Klra1/Ly49a*, (B) *Klra2/Ly49b*, (C) *Klra3/Ly49c*, (D) *Klra4/Ly49d*, (E) *Klra5/Ly49e*, (F)

*Klra6/Ly49f*, (G) *Klra7/Ly49g*, (H) *Klra8/Ly49h*, (I) *Klra9/Ly49i*, (J) *Klra10/Ly49j*, (K) *Klra11-ps/Ly49k*, (L)

*Klra13-ps/Ly49m*, (M) *Klra14/Ly49n*, (N) *Klra17/Ly49q*, (O) *Gm6548*, and (P) *Gm15854/Ly49x*. (Q)

Nucleotide level analysis of the  $\Delta$ Ly49-1 deletions for the haplotype corresponding to **Fig 2A** at the

*Ly49g-Ly49a* and *Ly49n-Ly49k* junctions.

### Fig S2. Flow cytometric characterization of CRISPR-Cas9 modified mice.

Offset flow histograms are shown for mice on the D8-KODO (H2D<sup>d</sup>) MHC background with the indicated

CRISPR-Cas9 modifications. Single-cell suspensions of mouse splenocytes were gated for expression of

specific proteins with loci near or in the NKC. (A-O) Shown is a representative plot of

NK1.1<sup>+</sup>/NKp46<sup>+</sup>/CD19<sup>-</sup>/CD3<sup>-</sup> lymphocytes. Protein levels assessed in each panel are as follows: (A) Ly49A,

(B) Ly49C, (C) Ly49D, (D) Ly49EF, (E) Ly49F, (F) Ly49G, (G) Ly49H, (H) Ly49I, (I) CDD94, (J) NKG2A, (K)

NKG2D, (L) CD69, (M) CD122, (N) CD127 and (O) 2B4. The flow cytometric analyses were repeated twice with 3 mice per group. Below the plots, quantification of the flow data as frequencies (A-J) or MFI (K-O) from one of two representative experiments is provided. Statistical analysis was performed with a Student's *t*-Test with D8-KODO expression frequency used as a comparator. (P) Representative maturation plots are shown for all experimental mice with the summation of a representative experiment provided at the bottom. No significant deviations were noted. Analyses were repeated twice with 3 mice per group. (Q) Quantification of NK cell frequencies gated as CD3<sup>-</sup>CD19<sup>-</sup>NK1.1<sup>+</sup> lymphocytes. Statistical analysis was performed with a Student's *t*-Test with D8-KODO expression frequency used as a comparator as above. (R) Flow cytometric analysis of mice heterozygous for the  $\Delta$ Ly49-1 D8-KODO KO (F<sub>1</sub> hybrids of KODO mice with intact *Ly49s* and  $\Delta$ Ly49-1 D8-KODO mice from **Fig2B**) compared with KO and WT mice. Experiments were performed twice with 5-7 mice per group, with the exception that WT mice were assessed only once in this panel with values consistent with panels above. (S) Flow cytometry gating strategy.

**Fig S3. Strategy and characterization of the NKp46-Ly49A knockin.**

(A) CRISPR knockin strategy for Ly49A expression on NKp46-expressing cells. 2 CRISPR guides, T1 and T3 (**Table S1**) were injected into B6 zygotes along with Cas9 mRNA and a donor DNA construct engineered to express the *Ly49A* cDNA following a P2A cleavage site such that the Ly49A expression would be proportional to NKp46 (*Ncr1*) transcript levels. (B) The final NKp46 TGA stop codon and several downstream bases (yellow highlighted region) in the coding region of exon 7 (blue text) were removed and replaced with a P2A site (purple text), *Ly49A* cDNA (red text) and finally the remainder of the NKp46 3' UTR sequence (green text). This donor vector with NKp46 homologous arms was co-injected with sgRNA for *Ncr1* and Cas9 into B6 zygotes and positive knockin mice were selected at birth by PCR analysis and confirmed at 6 weeks of age by flow cytometry. (C) One *Ly49A* KI line was crossed to the

$\Delta$ Ly49-1 D8-KODO mice (**Fig 2A**) heterozygous for one knockin allele and confirmed by flow cytometry. Lymphocytes for splenic single cell suspensions were assessed for both NK1.1 and Ly49A expression. Approximately 18% of NK cells from WT (D8-KODO) mice expressed Ly49A, while the  $\Delta$ Ly49-1 D8-KODO mice lacked all Ly49A expression unless expressing the Ly49A from the knockin construct (nearly 100% expression). As shown, Ly49A expression was restricted to NK1.1<sup>+</sup> splenocytes.

**Fig S4. *In vivo* cytotoxicity in Ly49AG KO and Ly49AYF mice.**

*In vivo* cytotoxicity of MHC-I deficient (KODO) or sufficient (D8-KODO) splenocytes following differential labelling with Celltrace Violet and flow cytometric analysis recovered from spleens at 2 days post-injection. (A) Flow cytometric analysis of input cells is shown (prior to injection). The experimental design is also depicted with the timing of antibody depletion relative to injection and harvest. (B) Representative histogram plots of the mice indicated in each row and treatments by column. The peaks are identified by the input plot shown in (A). (C) Quantification was performed as previously described (**Fig 4C**). Data are representative of two independent experiments with three recipient mice per group that received the same mix of donor cells in each experiment. Standard error of the mean is shown; statistical analysis performed with a Student's *t*-Test. \* $p < .05$ , \*\*\*\* $p < .0001$ .

**Fig S5. Sanger sequence analysis of *m06* and *m152* in CRISPR-modified MCMV strains.**

Viral DNA was isolated from *in vitro* cell cultures infected with CRISPR-Cas9 modified MCMV used in these studies. The specific CRISPR-targeted ORFs, (A) *m06* and (B) *m152*, were Sanger sequenced to confirm and characterize the frameshift in on-target variants. The primers used for PCR and subsequent sequence analysis are shown in **Table S5**. Each panel depicts the reference sequence above with the region of the ORF expanded for analysis. The Sanger alignments below for the viruses indicated are designated as to which strains (*left* of trace) were analyzed.  $\Delta$ m157-MCMV is the wild-type genome at

these ORFs, for comparison. Red boxes indicate where inserted nucleotides were identified. Sequence analysis was confirmed in both the forward and reverse direction, however, only one direction is shown for clarity.

### **Fig S6. Multi-step growth curve**

Multi-step *in vitro* growth kinetics of two strains of MCMV, as indicated. Cells and supernatants were harvested at the indicated days and quantified by real-time PCR. Data is a representative of two independent experiments with each data point performed in triplicate. All timepoints were shown to significantly different in terms of viral load ( $p < .0001$ ); statistical analysis performed with a Student's *t*-Test.

### **Fig S7. Model for MHC-restricted and Ly49 receptor-dependent MCMV resistance.**

(A) Activation receptor Ly49H-dependent induces killing of m157-expressing MCMV-infected cells. (B) Deficiency of m157 prevents rejection of MCMV in B6 mice expressing H2K<sup>b</sup> (H2D<sup>b</sup> is present but not shown for clarity). (C) Granzyme and perforin expression on licensed NK cells are required for control of m157-deficient virus in H2D<sup>d</sup>-expressing mice. (D) MHC-I downmodulation by MCMV prevents recognition of missing-self rejection in mice lacking Ly49A and Ly49G with unlicensed NK cells. (E) MCMV ORFs, *m06* and *m152*, are essential for the NK-specific protective response and the loss of these molecules results in the emergence of T cell-dependent resistance and concomitant loss of NK cell-dependent control by licensed NK cells.

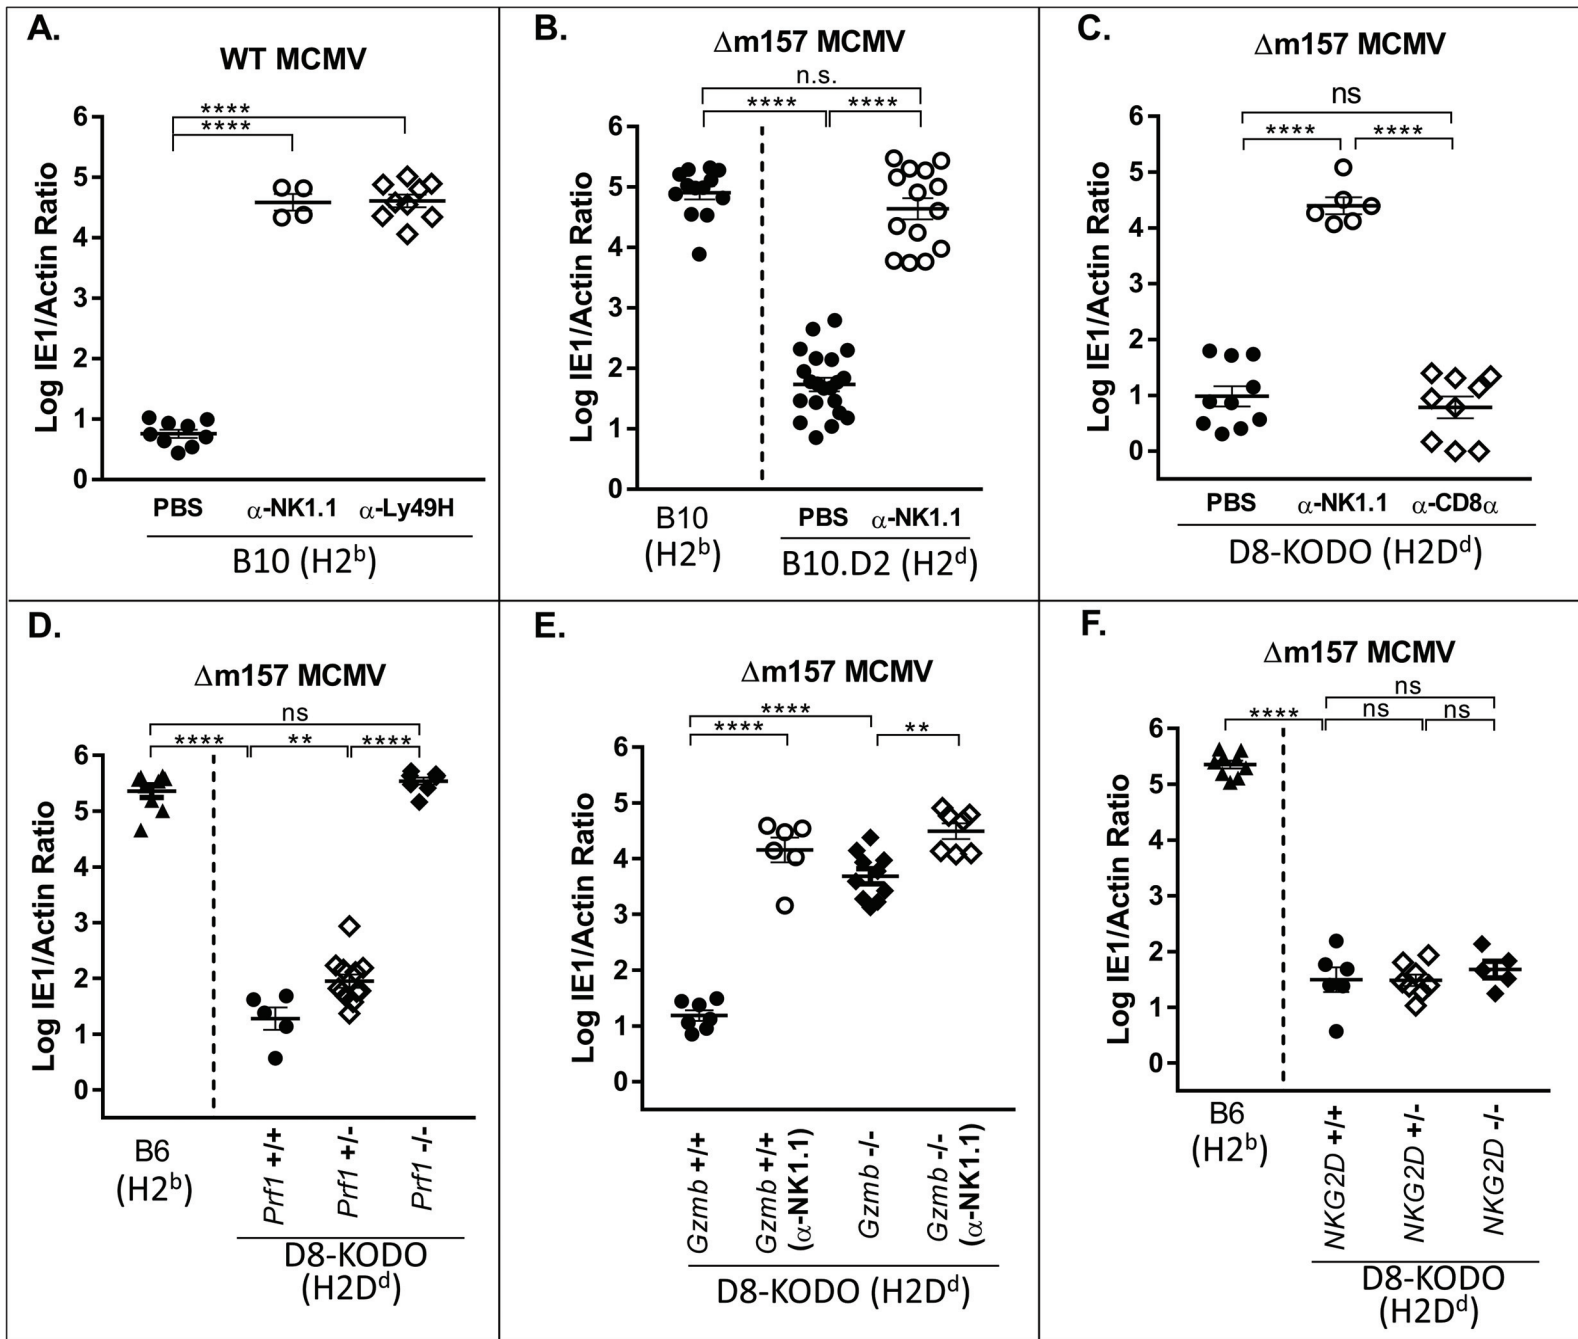

**Fig 1. H2<sup>d</sup>-dependent protection against MCMV lacking m157 requires cytotoxic NK cells.**

Splenic viral titers in mice depleted of total NK cells, CD8<sup>+</sup> T-cells, or where Ly49H<sup>+</sup> receptors on NK cells were blocked. Data represent a composite of two independent experiments with 3-7 mice per group with individual points representing a single mouse using (A) H2<sup>b</sup>-expressing B10 mice, (B) B10 and H2<sup>d</sup>-expressing B10.D2 mice, (C) H2D<sup>d</sup>-expressing (D8-KODO) mice, (D-F) D8-KODO mice with wild-type, heterozygous, or no expression of (D) perforin (*Prf1*), (E) granzyme B (*Gzmb*), and (F) NKG2D (*Klrk1*).

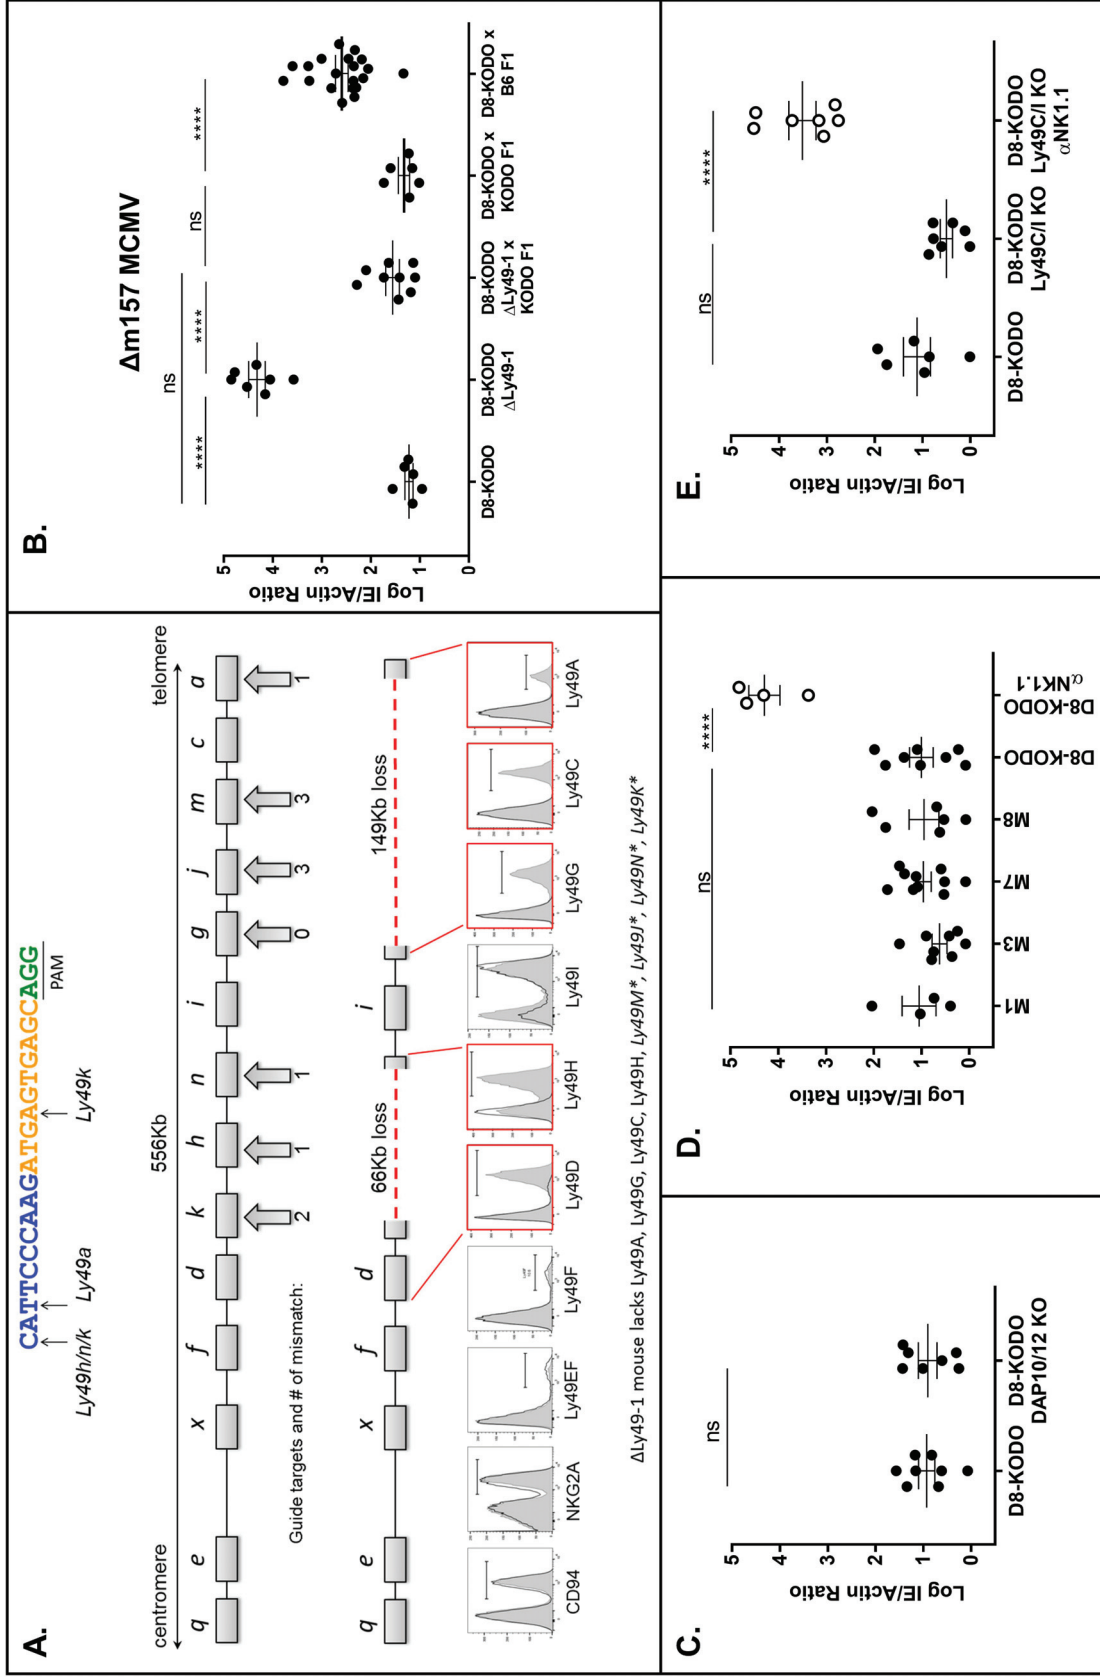

**Fig 2. NK cell resistance to Δm157-MCMV requires specific Ly49 receptors.**

(A) The CRISPR sgRNA used for targeting is shown; PAM site underlined, 10nt core in yellow. Mismatches between the sgRNA and targeted Ly49s are represented below the guide. B6 Ly49 cluster with the number of predicted mismatches shown below. Loss of genetic regions is indicated as a red dashed line; flow cytometry histograms indicate wild-type D8-KODO (shaded) and ΔLy49-1 D8-KODO (solid line) NK cell expression. (B-E) Δm157-MCMV splenic titers; data represent a composite of at least two independent experiments with 3-7 mice per group: (B) D8-KODO, ΔLy49-1 D8-KODO and the indicated F1 mice; (C-E) D8-KODO mice (C) lacking DAP10 and DAP12, (D) with Ly49m deletions and (E) lacking Ly49C and Ly49I.

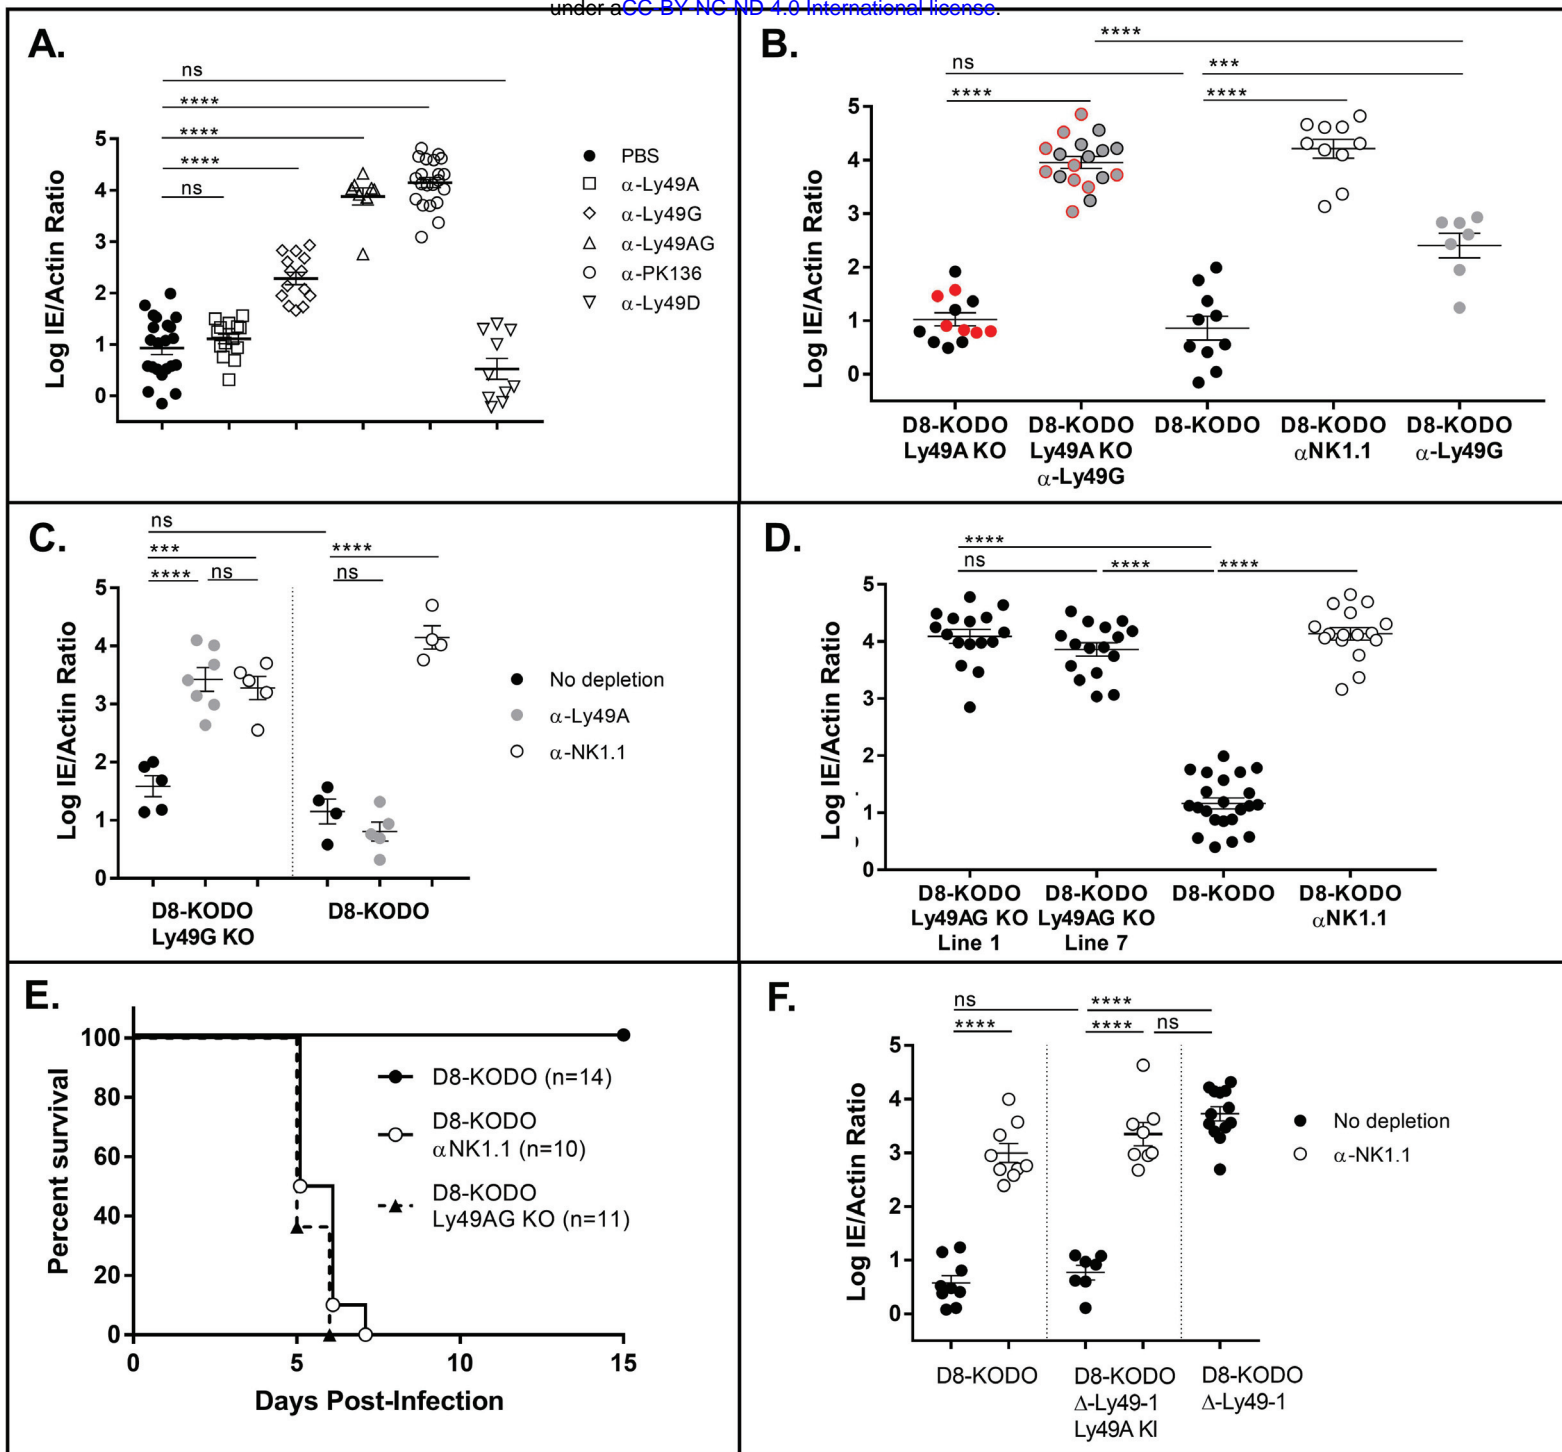

**Fig 3. Ly49G and Ly49A are required for H2D<sup>d</sup>-dependent  $\Delta$ m157-MCMV resistance.** (A-D, F)  $\Delta$ m157-MCMV splenic titers; data represent a composite of multiple independent experiments, as noted, with 3-7 mice per group with individual points representing a single mouse. Mice used were (A) D8-KODO, five experiments; and (B) two lines lacking Ly49A (black vs. red), three experiments; (C) Ly49G knockout mice, representative of two experiments; (D) two lines lacking Ly49A and Ly49G, five experiments; (F) and  $\Delta$ Ly49-1 D8-KODO with or without the Ly49A knockin, two experiments. (E) Composite survival analysis of D8-KODO and Ly49A/G knockout mice; two experiments.



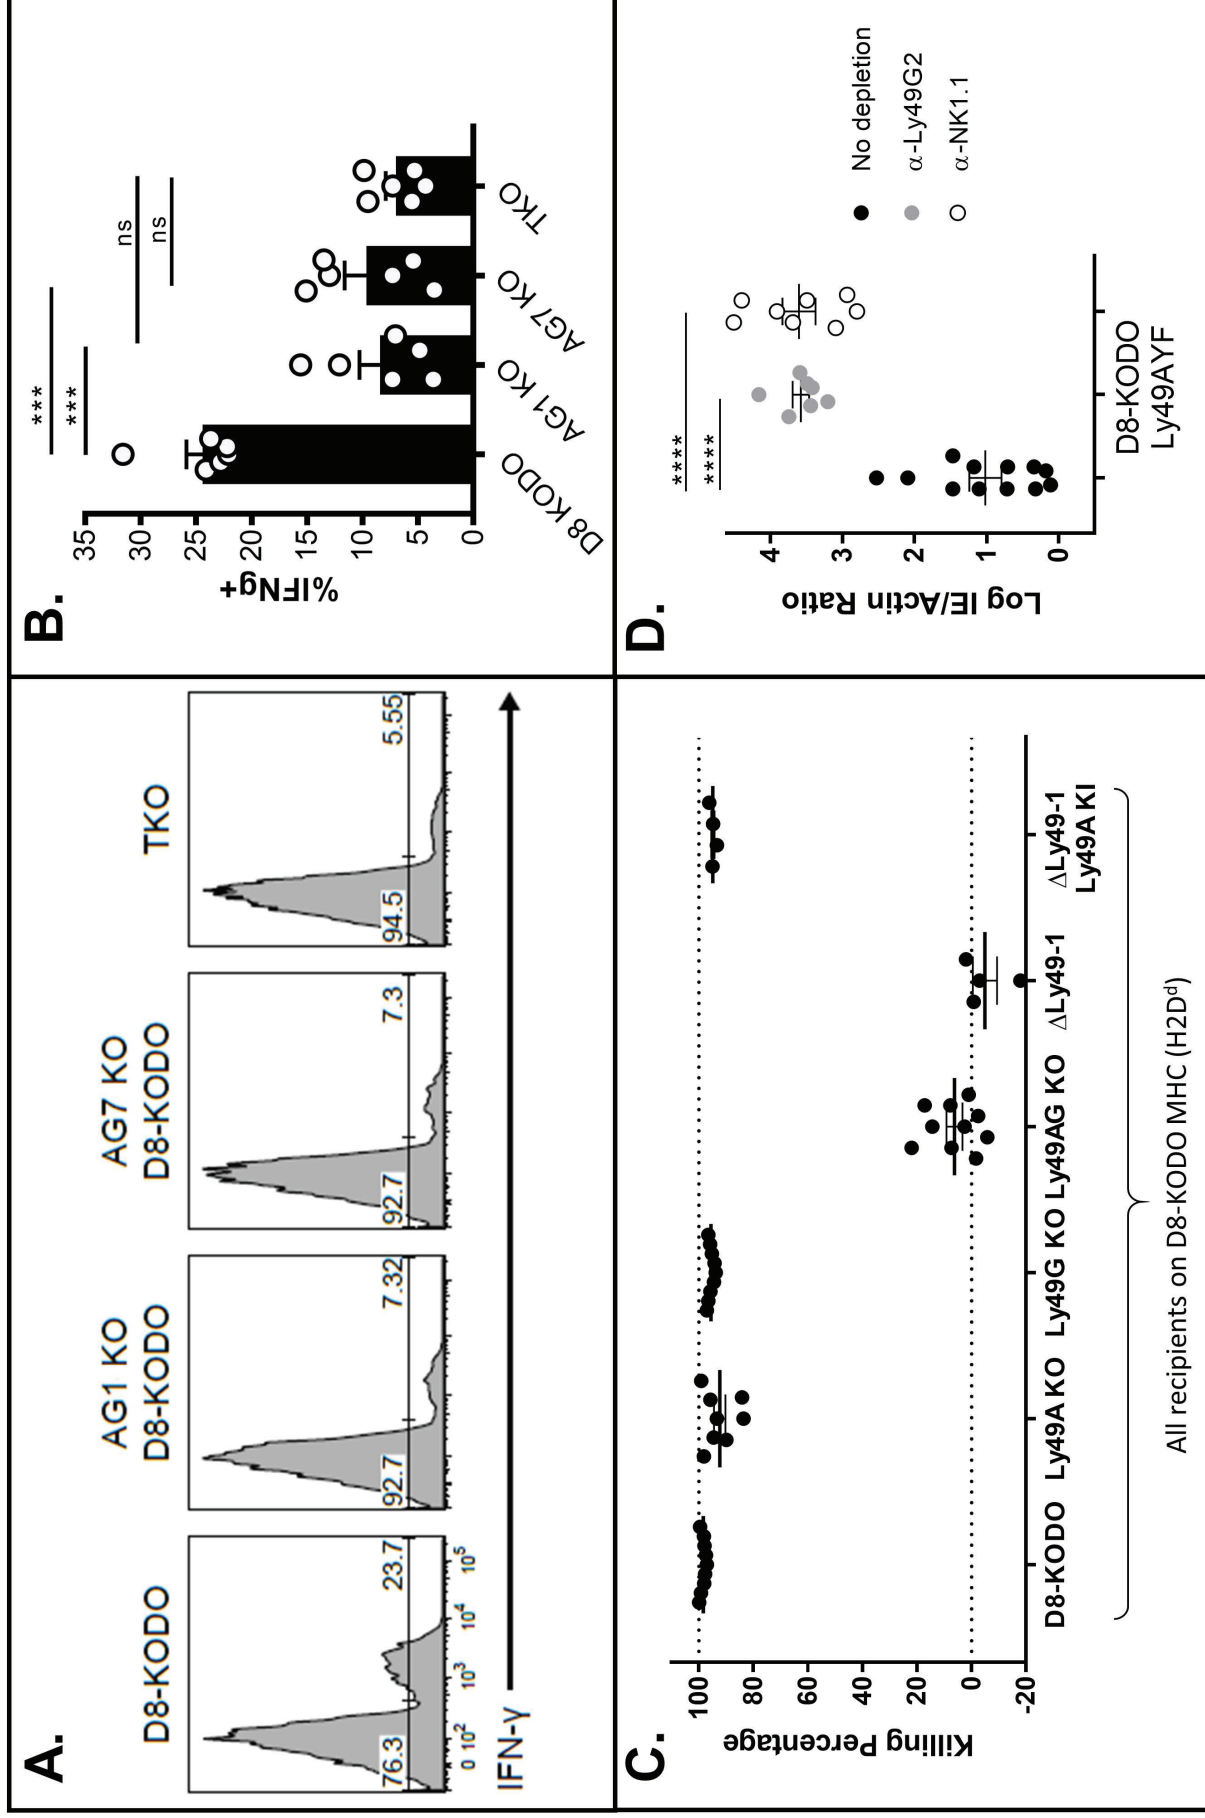

**Fig 4. NK cell licensing and missing-self rejection in D8-KODO mice both require Ly49A and Ly49G.**

(A) Representative histogram plots depicting the frequency of interferon gamma positive (IFN $\gamma$ +) NK cells following NK1.1 stimulation in D8-KODO, Ly49A/G KO mice, and TKO (KODO  $\beta$ 2m KO) mice. (B) Composite plot of IFN $\gamma$ <sup>+</sup> frequencies from (A); two independent experiments with 3 mice per group. (C) *In vivo* cytotoxicity of KODO or D8-KODO splenocytes. Data are cumulative over two independent experiments with 4-5 recipient mice per group. (D)  $\Delta$ m157-MCMV infection as in Fig 2B; three independent experiments.

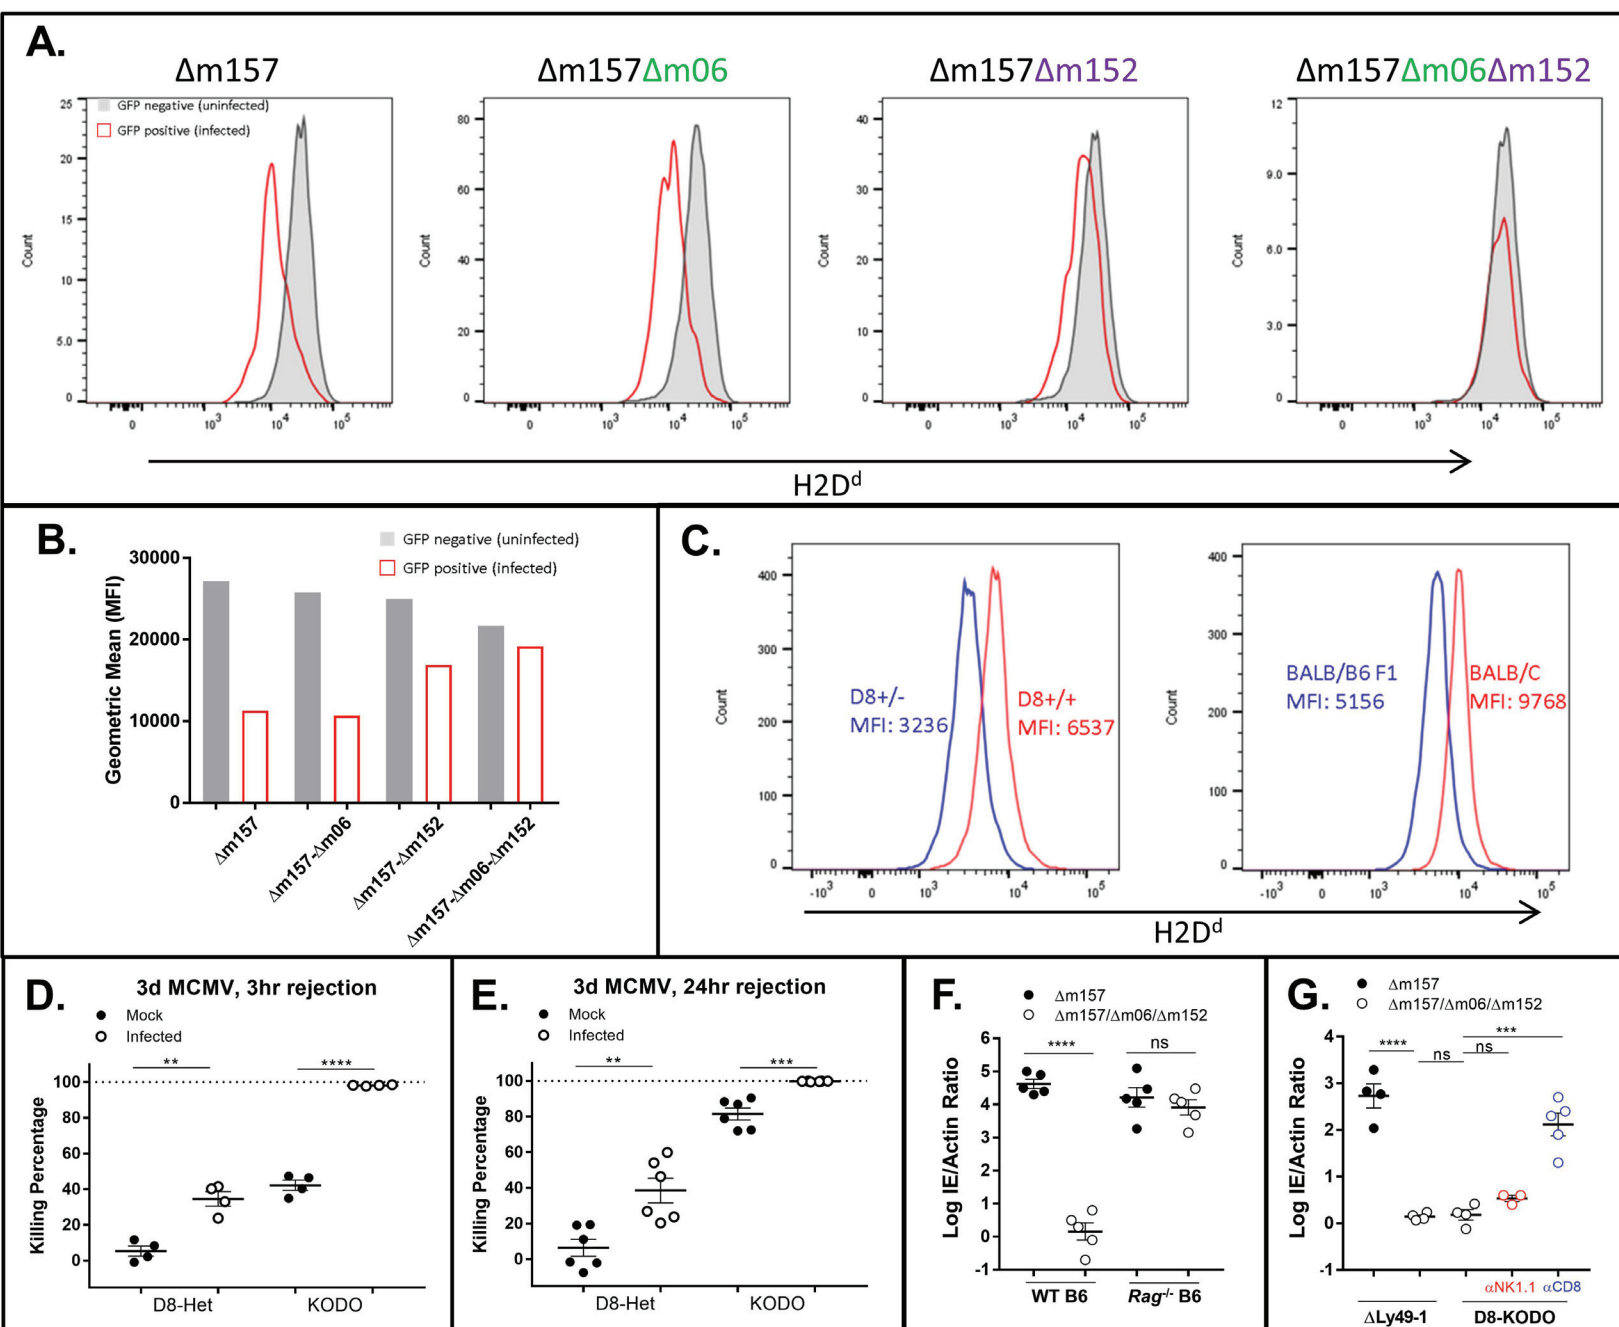

**Fig 5. Down-regulation of H2D<sup>d</sup> through *m06* and *m152* affects host MCMV control.**

(A,B) 24hr *in vitro* infection and flow cytometric evaluation of D8-KODO MEFs with GFP-expressing MCMV lacking the indicated ORFs; representative of two independent infections. (C) MFI of H2D<sup>d</sup> in mice homozygous and heterozygous for the D8 transgene (*left*), compared to BALB/c (H2<sup>d/d</sup>) and BALB/c x B6 F1 (H2<sup>b/d</sup>) mice (*right*); representative of two independent experiments. (D) 3 hr or (E) 24 hr *in vivo* cytotoxicity with KODO or D8-KODO heterozygous (D8-Het; H2<sup>d+/-</sup>) donor cells. Composite of (E) one or (D) two independent experiments. (F)  $\Delta m157$  or  $\Delta m157/m06/m152$  MCMV infection of B6 or *Rag1*<sup>-/-</sup> and (G) D8-KODO or  $\Delta Ly49-1$  D8-KODO mice.

## References

1. Horst D, Verweij MC, Davison AJ, Rensing ME, Wiertz EJHJ (2011) Viral evasion of T cell immunity: ancient mechanisms offering new applications. *Curr Opin Immunol* **23**: 96-103.
2. Gainey MD, Rivenbark JG, Cho H, Yang L, Yokoyama WM (2012) Viral MHC class I inhibition evades CD8+ T-cell effector responses in vivo but not CD8+ T-cell priming. *Proc Natl Acad Sci USA* **109**: E3260-3267.
3. Ljunggren HG, Kärre K (1990) In search of the 'missing self': MHC molecules and NK cell recognition. *Immunol Today* **11**: 237-244.
4. Kärre K, Ljunggren HG, Piontek G, Kiessling R (1986) Selective rejection of H-2-deficient lymphoma variants suggests alternative immune defence strategy. *Nature* **319**: 675-678.
5. Karlhofer FM, Ribaldo RK, Yokoyama WM (1992) MHC class I alloantigen specificity of Ly-49 + IL-2-activated natural killer cells. *Nature* **358**: 66-70.
6. Yokoyama WM, Plougastel BFM (2003) Immune functions encoded by the natural killer gene complex. *Nat Rev Immunol* **3**: 304-316.
7. Rahim MMA, Makrigiannis AP (2015) Ly49 receptors: evolution, genetic diversity, and impact on immunity. *Immunol Rev* **267**: 137-147.
8. Long EO, Kim HS, Liu D, Peterson ME, Rajagopalan S (2013) Controlling natural killer cell responses: integration of signals for activation and inhibition. *Annu Rev Immunol* **31**: 227-258.
9. Dam J, Guan R, Natarajan K, Dimasi N, Chlewicki LK, et al. (2003) Variable MHC class I engagement by Ly49 natural killer cell receptors demonstrated by the crystal structure of Ly49C bound to H-2K(b). *Nat Immunol* **4**: 1213-1222.
10. Hanke T, Takizawa H, McMahon CW, Busch DH, Pamer EG, et al. (1999) Direct Assessment of MHC Class I Binding by Seven Ly49 Inhibitory NK Cell Receptors. *Immunity* **11**: 67-77.
11. Kim S, Poursine-Laurent J, Truscott SM, Lybarger L, Song YJ, et al. (2005) Licensing of natural killer cells by host major histocompatibility complex class I molecules. *Nature* **436**: 709-713.
12. Guillamón CF, Martínez-Sánchez MV, Gimeno L, Mrowiec A, Martínez-García J, et al. (2018) NK Cell Education in Tumor Immune Surveillance: DNAM-1/KIR Receptor Ratios as Predictive Biomarkers for Solid Tumor Outcome. *Cancer Immunol Res* **6**: 1537-1547.
13. Rahim MMA, Chen P, Mottashed AN, Mahmoud AB, Thomas MJ, et al. (2015) The mouse NKR-P1B:Clr-b recognition system is a negative regulator of innate immune responses. *Blood* **125**: 2217-2227.
14. Brown MG, Dokun AO, Heusel JW, Smith HRC, Beckman DL, et al. (2001) Vital Involvement of a Natural Killer Cell Activation Receptor in Resistance to Viral Infection. *Science* **292**: 934-937.
15. Arase H, Mocarski ES, Campbell AE, Hill AB, Lanier LL (2002) Direct recognition of cytomegalovirus by activating and inhibitory NK cell receptors. *Science* **296**: 1323-1326.

16. Pyzik M, Charbonneau B, Gendron-Pontbriand EM, Babic M, Krmpotic A, et al. (2011) Distinct MHC class I-dependent NK cell-activating receptors control cytomegalovirus infection in different mouse strains. *J Exp Med* **208**: 1105-1117.
17. Corbett AJ, Coudert JD, Forbes CA, Scalzo AA (2011) Functional consequences of natural sequence variation of murine cytomegalovirus m157 for Ly49 receptor specificity and NK cell activation. *J Immunol* **186**: 1713-1722.
18. Orr MT, Murphy WJ, Lanier LL (2010) 'Unlicensed' natural killer cells dominate the response to cytomegalovirus infection. *Nat Immunol* **11**: 321-327.
19. Babić M, Pyzik M, Zafirova B, Mitrović M, Butorac V, et al. (2010) Cytomegalovirus immunoevasin reveals the physiological role of "missing self" recognition in natural killer cell dependent virus control in vivo. *J Exp Med* **207**: 2663-2673.
20. Pyzik M, Dumaine A, Dumaine AA, Charbonneau B, Fodil-Cornu N, et al. (2014) Viral MHC class I-like molecule allows evasion of NK cell effector responses in vivo. *J Immunol* **193**: 6061-6069.
21. Higuchi DA, Cahan P, Gao J, Ferris ST, Poursine-Laurent J, et al. (2010) Structural variation of the mouse natural killer gene complex. *Genes Immun* **11**: 637-648.
22. Nabekura T, Gotthardt D, Niizuma K, Trsan T, Jenus T, et al. (2017) Cutting Edge: NKG2D Signaling Enhances NK Cell Responses but Alone Is Insufficient To Drive Expansion during Mouse Cytomegalovirus Infection. *J Immunol* **199**: 1567-1571.
23. Zafirova B, Mandarić S, Antulov R, Krmpotić A, Jonsson H, et al. (2009) Altered NK Cell Development and Enhanced NK Cell-Mediated Resistance to Mouse Cytomegalovirus in NKG2D-Deficient Mice. *Immunity* **31**: 270-282.
24. Depatie C, Muise E, Lepage P, Gros P, Vidal SM (1997) High-resolution linkage map in the proximity of the host resistance locus *Cmv1*. *Genomics* **39**: 154-163.
25. Xie X, Stadnisky MD, Brown MG (2009) MHC class I Dk locus and Ly49G2+ NK cells confer H-2k resistance to murine cytomegalovirus. *J Immunol* **182**: 7163-7171.
26. Diefenbach A, Tomasello E, Lucas M, Jamieson AM, Hsia JK, et al. (2002) Selective associations with signaling proteins determine stimulatory versus costimulatory activity of NKG2D. *Nat Immunol* **3**: 1142-1149.
27. McQueen KL, Lohwasser S, Takei F, Mager DL (1999) Expression analysis of new Ly49 genes: most transcripts of Ly49j lack the transmembrane domain. *Immunogenetics* **49**: 685-691.
28. Smith HR, Karlhofer FM, Yokoyama WM (1994) Ly-49 multigene family expressed by IL-2-activated NK cells. *J Immunol* **153**: 1068-1079.
29. Jonsson AH, Yang L, Kim S, Taffner SM, Yokoyama WM (2010) Effects of MHC class I alleles on licensing of Ly49A+ NK cells. *J Immunol* **184**: 3424-3432.

30. Silver ET, Lavender KJ, Gong D-E, Hazes B, Kane KP (2002) Allelic variation in the ectodomain of the inhibitory Ly-49G2 receptor alters its specificity for allogeneic and xenogeneic ligands. *J Immunol* **169**: 4752-4760.
31. Bern MD, Beckman DL, Ebihara T, Taffner SM, Poursine-Laurent J, et al. (2017) Immunoreceptor tyrosine-based inhibitory motif-dependent functions of an MHC class I-specific NK cell receptor. *Proc Natl Acad Sci USA* **114**: E8440-E8447.
32. Sun K, Alvarez M, Ames E, Barao I, Chen M, et al. (2012) Mouse NK cell-mediated rejection of bone marrow allografts exhibits patterns consistent with Ly49 subset licensing. *Blood* **119**: 1590-1598.
33. Pinto AK, Munks MW, Koszinowski UH, Hill AB (2006) Coordinated Function of Murine Cytomegalovirus Genes Completely Inhibits CTL Lysis. *J Immunol* **177**: 3225-3234.
34. Wagner M, Gutermann A, Podlech J, Reddehase MJ, Koszinowski UH (2002) Major Histocompatibility Complex Class I Allele-specific Cooperative and Competitive Interactions between Immune Evasion Proteins of Cytomegalovirus. *J Exp Med* **196**: 805-816.
35. Reusch U, Muranyi W, Lucin P, Burgert HG, Hengel H, et al. (1999) A cytomegalovirus glycoprotein re-routes MHC class I complexes to lysosomes for degradation. *EMBO J* **18**: 1081-1091.
36. Ziegler H, Thale R, Lucin P, Muranyi W, Flohr T, et al. (1997) A mouse cytomegalovirus glycoprotein retains MHC class I complexes in the ERGIC/cis-Golgi compartments. *Immunity* **6**: 57-66.
37. Bern MD, Parikh BA, Yang L, Beckman DL, Poursine-Laurent J, et al. (2019) Inducible down-regulation of MHC class I results in natural killer cell tolerance. *J Exp Med* **216**: 99-116.
38. Smith HRC, Heusel JW, Mehta IK, Kim S, Dorner BG, et al. (2002) Recognition of a virus-encoded ligand by a natural killer cell activation receptor. *Proc Natl Acad Sci USA* **99**: 8826-8831.
39. Daher M, Rezvani K (2018) Next generation natural killer cells for cancer immunotherapy: the promise of genetic engineering. *Curr Opin Immunol* **51**: 146-153.
40. Inui M, Kikuchi Y, Aoki N, Endo S, Maeda T, et al. (2009) Signal adaptor DAP10 associates with MDL-1 and triggers osteoclastogenesis in cooperation with DAP12. *Proc Natl Acad Sci USA* **106**: 4816-4821.
41. Heusel JW, Wesselschmidt RL, Shresta S, Russell JH, Ley TJ (1994) Cytotoxic lymphocytes require granzyme B for the rapid induction of DNA fragmentation and apoptosis in allogeneic target cells. *Cell* **76**: 977-987.
42. Bieberich C, Scangos G, Tanaka K, Jay G (1986) Regulated expression of a murine class I gene in transgenic mice. *Mol Cell Biol* **6**: 1339-1342.
43. O'Brien A, Bailey TL (2014) GT-Scan: identifying unique genomic targets. *Bioinformatics* **30**: 2673-2675.
44. Stemmer M, Thumberger T, Del Sol Keyer M, Wittbrodt J, Mateo JL (2015) CCTop: An Intuitive, Flexible and Reliable CRISPR/Cas9 Target Prediction Tool. *PLoS ONE* **10**: e0124633.

45. Parikh BA, Beckman DL, Patel SJ, White JM, Yokoyama WM (2015) Detailed Phenotypic and Molecular Analyses of Genetically Modified Mice Generated by CRISPR-Cas9-Mediated Editing. *PLoS ONE* **10**: e0116484.
46. Henry SC, Schmader K, Brown TT, Miller SE, Howell DN, et al. (2000) Enhanced green fluorescent protein as a marker for localizing murine cytomegalovirus in acute and latent infection. *J Virol Methods* **89**: 61-73.
47. Hsu KM, Pratt JR, Akers WJ, Achilefu SI, Yokoyama WM (2009) Murine cytomegalovirus displays selective infection of cells within hours after systemic administration. *J Exp Med* **90**: 33-43.
48. Cheng TP, Valentine MC, Gao J, Pingel JT, Yokoyama WM (2010) Stability of Murine Cytomegalovirus Genome after In Vitro and In Vivo Passage. *J Virol* **84**: 2623-2628.
49. Cong L, Ran FA, Cox D, Lin S, Barretto R, et al. (2013) Multiplex genome engineering using CRISPR/Cas systems. *Science* **339**: 819-823.
50. Ran FA, Hsu PD, Wright J, Agarwala V, Scott DA, et al. (2013) Genome engineering using the CRISPR-Cas9 system. *Nat Protoc* **8**: 2281-2308.
51. Parikh BA, Piersma SJ, Pak-Wittel MA, Yang L, Schreiber RD, et al. (2015) Dual Requirement of Cytokine and Activation Receptor Triggering for Cytotoxic Control of Murine Cytomegalovirus by NK Cells. *PLoS Pathog* **11**: e1005323.
52. Roland J, Cazenave PA (1992) Ly-49 antigen defines an alpha beta TCR population in i-IEL with an extrathymic maturation. *Int Immunol* **4**: 699-706.
53. Brennan J, Lemieux S, Freeman JD, Mager DL, Takei F (1996) Heterogeneity among Ly-49C natural killer (NK) cells: characterization of highly related receptors with differing functions and expression patterns. *J Exp Med* **184**: 2085-2090.
